# Supplementary material
Source: ML conference proceedings conference paper supplement (https://openaccess.thecvf.com/content/ICCV2023/html/Chen_Multi-view_Self-supervised_Disentanglement_ICCV_2023_paper.html)
Supplement: Supplementary file 1 [file Chen_Multi-view_Self-supervised_Disentanglement_ICCV_2023_supplemental.pdf]

# Multi-view Self-supervised Disentanglement for General Image Denoising (Supplementary Material)

## Contents

|                                                                |          |
|----------------------------------------------------------------|----------|
| <b>1. Introduction</b>                                         | <b>1</b> |
| <b>2. Denoising Training Settings</b>                          | <b>1</b> |
| 2.1. Hyperparameter Analysis . . . . .                         | 1        |
| <b>3. Additional Denoising Evaluation</b>                      | <b>2</b> |
| 3.1. Generalisation on Unseen Noise Removal . .                | 2        |
| 3.2. Further Analysis on Real-world Generalisation             | 2        |
| <b>4. More Application Exploration</b>                         | <b>3</b> |
| 4.1. Experiment on Image Super-resolution . . .                | 3        |
| 4.2. Experiment on Image Inpainting . . . . .                  | 3        |
| <b>5. Datasets</b>                                             | <b>3</b> |
| <b>6. Synthesising Noisy Data and Downsampling Corruptions</b> | <b>5</b> |
| 6.1. Synthesising Noise . . . . .                              | 5        |
| 6.2. Downscale Corruption . . . . .                            | 6        |
| <b>7. Additional Qualitative Results</b>                       | <b>6</b> |

## 1. Introduction

This document provides supplementary materials for the main paper. Specifically, Section 2 presents thorough details of the model training used in our experiments followed by an ablation study of parameters. The supplemental denoising quantitative evaluation is presented in Section 3. Section 4 explores more low-level applications, including image super-resolution and inpainting, with comparison to the proposed MeD. Section 5 and Section 6 provide further details regarding the datasets used in our research and the methods for synthesising noise and downscale corruption. Finally, we present more qualitative results, with comparison to other methods, in Section 7.

## 2. Denoising Training Settings

For methods that use *Swin-Tx* model, *e.g.* N2C [11], MeD and N2N [10], we use the same set of hyperparameters for training. Prior to the formal experiment, we conducted some pilot experiments to test and select the final choice of hyperparameters on N2C. Following [23, 11], we

use  $48 \times 48$  random crops from DIV2K images. The training process is performed using a mini-batch size of 8 and undergoes a total of 500K iterations. We use Adam with  $\beta_1 = 0.9$  and  $\beta_2 = 0.99$  and learning rate of  $10^{-4}$ , which decays every 100K with decay ratio 0.5.

Since the model is not the focus of this work, we use a simple 2-layer *Swin-Tx* for a fair comparison with other non-Transformer models, and is less likely to overfit the synthesised training noise distribution.

The influence of the size of the *Corruption Pool* on the performance of MeD and N2C [11] is demonstrated in Figure S1 (b). The experiments are started from only fixed Gaussian noise, then train on Gaussian noise with random sigma values. Finally, we expand the corruption pool from only Gaussian noise to more noise types and even with different types of down-scale and inpainting mask operations.

Table S1. Analysis of hyper-parameters for the loss terms.

| Loss Hyperparameters for<br>[ $\mathcal{L}^X$ , $\mathcal{L}^N$ , $\mathcal{L}^C$ , $\mathcal{L}^M$ ] | Gaussian Noise       |                      |                      |
|-------------------------------------------------------------------------------------------------------|----------------------|----------------------|----------------------|
|                                                                                                       | $\hat{\sigma} = 25$  | $\hat{\sigma} = 50$  | $\hat{\sigma} = 75$  |
| [1.0, 0.5, 0.5, 0.025]                                                                                | 31.18/ 0.8839        | 27.68/ 0.7765        | 25.74/ 0.7172        |
| [0.5, 1.0, 0.5, 0.025]                                                                                | 31.04/ 0.8813        | 27.87/ 0.7788        | 25.86/ 0.7190        |
| [0.5, 0.5, 1.0, 0.025]                                                                                | 30.85/ 0.8752        | 27.96/ 0.7794        | 25.92/ 0.7199        |
| [1.0, 1.0, 1.0, 0.025]                                                                                | <b>31.31/ 0.8876</b> | <b>28.05/ 0.7810</b> | <b>26.01/ 0.7216</b> |
| [1.0, 1.0, 1.0, 0.050]                                                                                | 31.29/ 0.8870        | 27.58/ 0.7659        | 24.29/ 0.6931        |
| [1.0, 1.0, 1.0, 0.000]                                                                                | 31.20/ 0.8832        | 26.24/ 0.7391        | 23.78/ 0.6517        |

## 2.1. Hyperparameter Analysis

Prior to finalising the training procedure, we conducted experiments to analyse the impact of different hyperparameters associated with the loss terms in our model. Specifically, we tested varying the weighting factors  $\mathcal{L}^X$ ,  $\mathcal{L}^N$ ,  $\mathcal{L}^C$  and  $\lambda$  for the *Noise Reconstruction loss*, *Scene Reconstruction loss*, *Cross Compose loss*, and *Mix Scene reconstruction loss*, respectively. The analysis is shown in Figure S1 (a) and Table S1

Firstly, we conducted the experiment for analysing the value  $\lambda$  in Figure S1 (a). The orange (top) curve represents the performance of the optimal choice  $\lambda = 0.05$ .

$\mathcal{L}^X$ ,  $\mathcal{L}^N$  and  $\mathcal{L}^C$  are tested from 0.5 to 1, with the best results obtained at  $\mathcal{L}^X = 1$ ,  $\mathcal{L}^N = 1$  and  $\mathcal{L}^C = 1$ .

Based on these experiments, we selected hyperparameters of  $\mathcal{L}^X = 1$ ,  $\mathcal{L}^N = 1$ ,  $\mathcal{L}^C = 1$ , and  $\lambda = 0.025$  for all

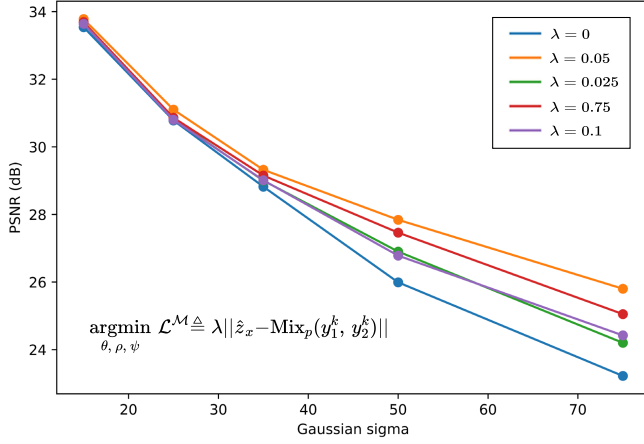

(a) Analysis on  $\lambda$  for Bernoulli Manifold Mixture

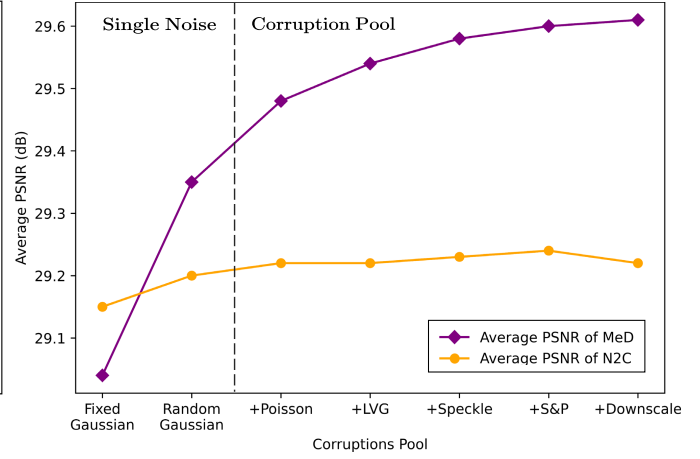

(b) Analysis on the training Corruptions Pool

Figure S1. **Ablation experiments.** All models are tested with Gaussian noise removal on the CBSD68 dataset, unless otherwise specified. (a) MeD with Bernoulli Manifold Mixture Loss achieves the best performance at  $\lambda = 0.05$  (the orange/top curve). (b) The performance of N2C and MeD is assessed while varying trained input corruptions. The findings suggest that MeD benefits much better from a diverse training corruption pool (the “+” sign in the horizontal axis indicates the further inclusion of a corruption in the corruption pool.).

Table S2. Supplementary quantitative comparison of different methods on CBSD68 dataset [12] for synthetic Gaussian noise. The experiments were conducted on fixed and random variance respectively. The best results are highlighted in **bold**, while the second best is underlined

| Training Schema           | Test $\hat{\sigma}$ | Noisy/ Clean         |                      | N2N [10]             | Noisy/ Noisy  |               | Invariant Feature |                      |
|---------------------------|---------------------|----------------------|----------------------|----------------------|---------------|---------------|-------------------|----------------------|
|                           |                     | N2C [11]             | DBD <sub>4</sub> [8] |                      | N2S [3]       | R2R [15]      | LIR [6]           | MeD                  |
| Gaussian<br>$\sigma = 15$ | 15                  | 33.21/ 0.9194        | 33.17/ 0.9179        | 33.16/ 0.9175        | 32.88/ 0.9099 | 31.19/ 0.8752 | 29.29/ 0.8118     | <b>33.20/ 0.9181</b> |
|                           | 25                  | <u>28.04/ 0.7588</u> | 26.36/ 0.7473        | 26.56/ 0.7521        | 26.27/ 0.7456 | 23.51/ 0.5529 | 21.80/ 0.4802     | <b>29.80/ 0.8401</b> |
|                           | 50                  | <u>19.89/ 0.3755</u> | 19.86/ 0.3741        | 19.68/ 0.3672        | 16.13/ 0.1978 | 16.09/ 0.2080 | 11.12/ 0.1217     | <b>23.51/ 0.5529</b> |
|                           | 75                  | <u>17.16/ 0.2562</u> | 16.62/ 0.2314        | 14.59/ 0.1561        | 14.99/ 0.1642 | 14.09/ 0.1280 | 11.10/ 0.1042     | <b>20.47/ 0.3870</b> |
| Gaussian<br>$\sigma = 50$ | 15                  | 30.69/ 0.8497        | 30.70/ 0.8478        | <u>30.80/ 0.8619</u> | 29.87/ 0.8267 | 28.15/ 0.7872 | 29.44/ 0.8011     | <b>30.88/ 0.8799</b> |
|                           | 25                  | 29.81/ 0.8140        | 29.63/ 0.8182        | <u>29.54/ 0.8256</u> | 29.54/ 0.8256 | 28.89/ 0.8099 | 28.95/ 0.7967     | <b>30.19/ 0.8218</b> |
|                           | 50                  | <u>28.56/ 0.7721</u> | 28.32/ 0.7765        | 28.30/ 0.7490        | 28.19/ 0.7802 | 27.80/ 0.7547 | 28.02/ 0.7682     | <b>28.56/ 0.7835</b> |
|                           | 75                  | <u>22.60/ 0.5877</u> | 22.47/ 0.6042        | 22.45/ 0.5759        | 21.69/ 0.5433 | 21.42/ 0.5881 | 20.25/ 0.5368     | <b>25.63/ 0.7372</b> |

denoising training in our work. This provides an optimal balance between the different objectives.

### 3. Additional Denoising Evaluation

In this section, we present additional quantitative evaluations of our denoising results, which were not included in the main paper. The results are in Table S2 with additive Gaussian Noise, supplement to Table 1 in the main paper.

#### 3.1. Generalisation on Unseen Noise Removal

To evaluate the generalisation ability of trained models on unseen noise removal, we conducted an additional experiment with more methods using only a single noisy image in Table S3. The results show that our method achieves comparable performance to state-of-the-art methods specially

designed for Gaussian noise removal, and outperforms all compared methods on other noise types, while training only on the Gaussian noise. This further highlights the generalisation ability of our approach in handling unseen and unfamiliar noise distributions.

#### 3.2. Further Analysis on Real-world Generalisation

In the main paper, we have shown that our method generalises well to real-world scenarios when trained only on synthetic data. Moreover, here we conduct experiments on training with a real-world dataset (SIDD without GT), and report the test results on SIDD and PolyU in Table S4.

**Analysis:** Comparing Table S4 and Table 4 in the main paper, it shows that all methods have significant improvement in performance on SIDD after training on SIDD, but little improvement on PolyU.

Table S3. Performance comparison of single-view approaches and Ours training on Gaussian noise and testing on various noise types.

| Noise Type                            | DIP [17]      | NAC [19]      | S2S [16]      | IDR [24]      | Restormer [21]       | MeD (Ours)           |
|---------------------------------------|---------------|---------------|---------------|---------------|----------------------|----------------------|
| Gaussian, $\hat{\sigma} \in [25, 75]$ | 25.62/ 0.7017 | 27.13/ 0.7391 | 27.71/ 0.7622 | 28.52/ 0.8061 | <b>29.10/ 0.8250</b> | 28.45/ 0.8057        |
| Speckle, $\hat{v} \in [25, 50]$       | 30.14/ 0.8574 | 31.55/ 0.8859 | 31.83/ 0.8980 | 28.62/ 0.8763 | 30.12/ 0.8557        | <b>33.48/ 0.9115</b> |
| S&P, $\hat{r} \in [0.3, 0.5]$         | 28.62/ 0.7957 | 29.89/ 0.8741 | 30.57/ 0.9053 | 27.26/ 0.7544 | 23.09/ 0.6381        | <b>30.84/ 0.9135</b> |
| AVG                                   | 28.13/ 0.7849 | 29.52/ 0.8330 | 30.04/ 0.8552 | 28.13/ 0.8123 | 27.44/ 0.7729        | <b>30.92/ 0.8770</b> |

Table S4. Train and test both on real-world datasets (PSNR/SSIM).

| Method         | MAC (G) | Supervised | Trained with   | SIDD [1]             | PolyU [20]           |
|----------------|---------|------------|----------------|----------------------|----------------------|
| Restormer [21] | 140.99  | ✓          | Real (SIDD)    | 40.06/ 0.9601        | 36.38/ 0.9588        |
| NAFNet [5]     | 63.6    | ✓          | Real (SIDD)    | <b>40.31/ 0.9667</b> | 27.36/ 0.9225        |
| N2N [11]       | 26.18   | ✗          | Real (SIDD)    | 32.82/ 0.7297        | 36.22/ 0.9679        |
| N2S [3]        | 26.18   | ✗          | Real (SIDD)    | 30.98/ 0.6018        | 36.41/ 0.9721        |
| CVF-SID [14]   | 77.86   | ✗          | Real (SIDD)    | 34.71/ 0.9179        | 33.00/ 0.8768        |
| MM-BSN [22]    | 339.46  | ✗          | Real (SIDD)    | 37.37/ 0.9362        | 35.40/ 0.9484        |
| MeD (Ours)     | 26.18   | ✗          | Synthetic (NP) | 35.81/ 0.8278        | 38.65/ 0.9855        |
| MeD (Ours)     | 26.18   | ✗          | NP + SIDD      | <b>37.52/ 0.9434</b> | <b>38.91/ 0.9894</b> |

Considering that collecting real data is expensive and sometimes infeasible compared to synthetic data and, as our following experiments show, generalising to new real datasets (real-to-real) is another issue (since the noise distributions are different), the model trained on synthetic noise data is more feasible and practical.

## 4. More Application Exploration

### 4.1. Experiment on Image Super-resolution

Figure S2 and Figure S3 show the qualitative results of our method for  $\times 3$  and  $\times 4$  super-resolution on Set5 dataset [4], compared with RCAN [25] and DASR [18]. It shows that our method achieves better performance than these methods, by using a corruption pool that contains both noise and down-scaling process.

### 4.2. Experiment on Image Inpainting

Evaluation is performed on Set11 [9]. Please see Figure S4 for two examples. It can be seen although our method is not designed for inpainting, we can still achieve better performance than state-of-the-art methods such as DIP [17] and S2S [16].

## 5. Datasets

We used five different datasets to train and evaluate the denoising methods: DIV2K [2], CBSD68 [12], SIDD [1], CC [13], and PolyU [20].

**DIV2K:** DIVERse 2K resolution high-quality images [2] (DIV2K) contain 800 high-resolution images with a resolution of 2K or 4K. To train our denoising method, we added

different types and levels of noise to the DIV2K dataset.

**CBSD68:** CBSD68 dataset [12] contains 68 colourful images with various levels of synthesising noise. These images were obtained from a range of sources, including natural scenes and synthetic images.

**SIDD:** The Smartphone Image Denoising Dataset [1] (SIDD) is a large-scale real-world dataset containing 24,000 images captured by smartphone cameras in ten scenes with varying lighting conditions. The ground truth images for the SIDD dataset are provided along with the noisy images in the dataset.

**CC:** Cross-Channel Image Noise Modeling [13] (CC) is another real-world dataset which contains 11 static scenes captured by three different consumer cameras. For each scene, it contains one temporal image and the precomputed temporal mean and covariance matrix data.

**PolyU:** PolyU dataset [20] is comprised of 40 different scenes captured by cameras. It contains the original image corrupted by realistic noise and the ground truth version which is obtained by averaging multiple exposures to remove the noise.

We also used Set5 dataset [4] and Set11 [9] to evaluate the super-resolution and image inpainting performances.

**Set5 dataset:** We use Set5 dataset [4] for super-resolution task. The Set5 dataset [4] consists of 5 high-quality images with different contents, including “baby”, “bird”, “butter-

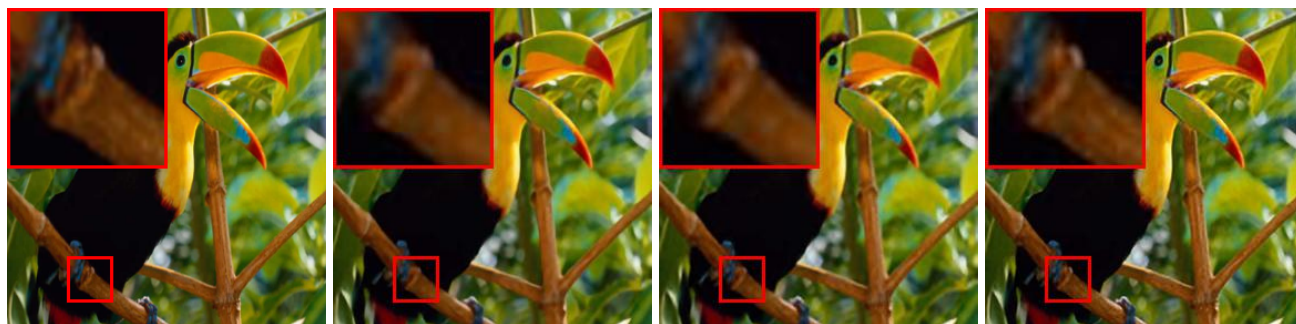

Set5 "Bird" [4]  
PSNR/SSIM

RCAN [25]  
34.89/ 0.9512

DASR [18]  
34.42/ 0.9364

MeD (Ours)  
**36.66/ 0.9747**

Figure S2. Visual comparison of image super-resolution (x3) methods on Set5 "Bird" [4] images.

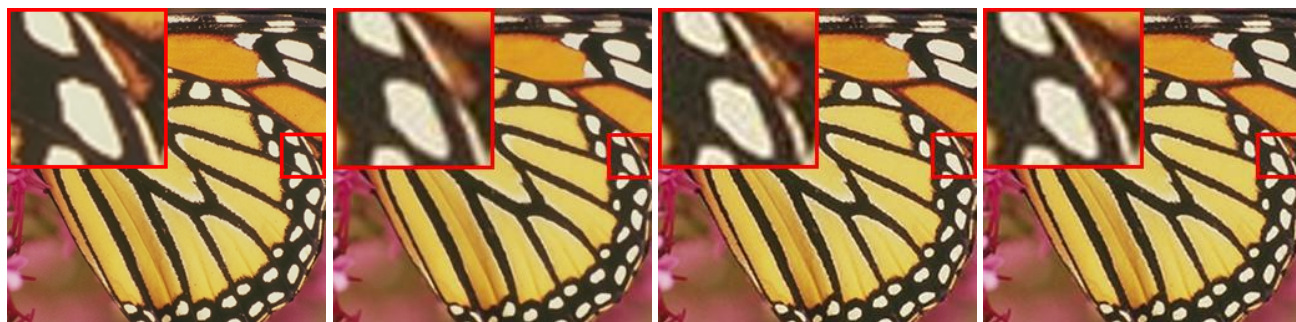

Set 5 "Butterfly" [4]  
PSNR/SSIM

RCAN [25]  
30.91/ 0.9459

DASR [18]  
30.82/ 0.9527

MeD (Ours)  
**31.12/ 0.9636**

Figure S3. Visual comparison of image super-resolution (x4) methods on Set5 "Butterfly" [4] images.

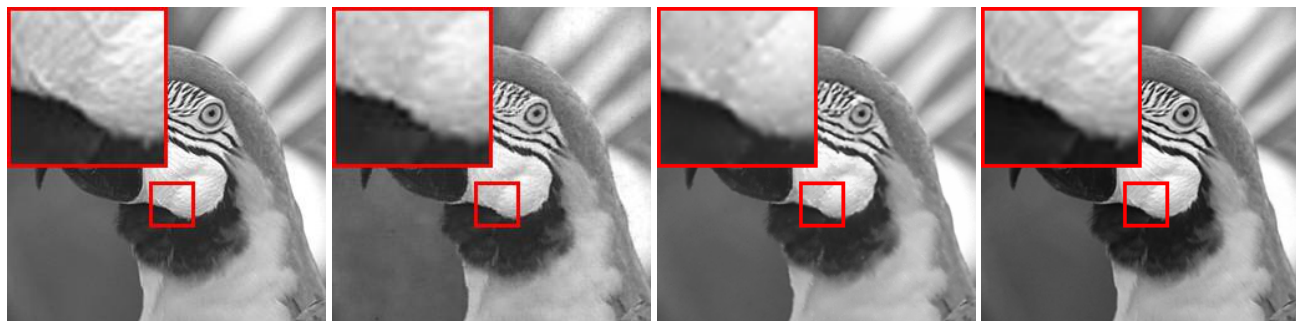

Set 11 "Parrots" [4]  
PSNR/SSIM

DIP [17]  
31.94/ 0.9479

S2S [16]  
33.91/ 0.9224

MeD (Ours)  
**34.01/ 0.9507**

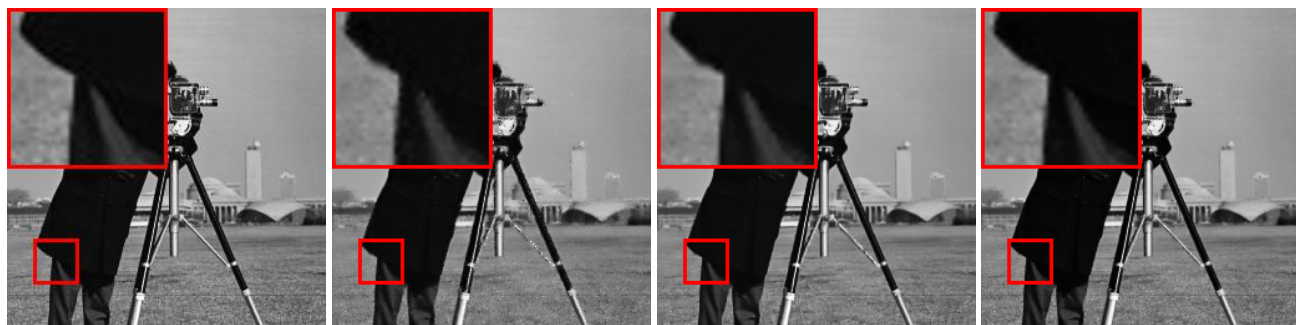

Set 11 "Cameraman" [4]  
PSNR/SSIM

DIP [17]  
30.97/ 0.9778

S2S [16]  
33.37/ 0.9355

MeD (Ours)  
**34.99/ 0.9478**

Figure S4. Visual comparison of image Inpainting methods on Set11 [9] images.

fly”, “head”, and “woman”. Each of the images in the Set5 dataset has a magnifying factor of 2, 3, or 4, allowing us to evaluate the performance of our image super-resolution model across a range of magnification factors.

**Set11 dataset:** We compare our method (MeD) with DIP [17] and S2S [16] on image inpainting tasks using the Set11 dataset [9], which contains 11 grayscale images.

## 6. Synthesising Noisy Data and Downsampling Corruptions

We utilise the Pillow library<sup>1</sup> in Python to synthesise noisy data and perform downsampling corruptions.

### 6.1. Synthesising Noise

To evaluate the performance of our proposed algorithm, we synthesised noisy images using several types of noise models, including Gaussian, Local Variance Gaussian, Poisson, Speckle, and Salt-and-Pepper.

**Remark:** The original pixel value at position  $(i, j)$  in the image can be notated as  $I(i, j)$  and the noisy pixel value can be notated as  $I_{noisy}$ .

**Gaussian Noise:** Gaussian noise is a type of additive noise that is commonly found in digital images. It is modelled as a normal distribution with zero mean and a standard deviation  $\sigma$ . To synthesise Gaussian noise, we added Gaussian-distributed noise to the original image. Specifically, we added Gaussian noise with zero mean and standard deviation  $\sigma$  to each pixel of the input image, where  $\sigma$  was set to 10. The noisy pixel value  $I_{noisy}(i, j)$  is given by:

$$I_{noisy}(i, j) = I(i, j) + N(i, j), \quad (1)$$

$N(i, j)$  is a random variable generated from a Gaussian distribution with zero mean and standard deviation  $\sigma$ .

**Local Variance Gaussian Noise:** Local Variance Gaussian noise is a variant of Gaussian noise that takes into account the local variance of the image. In this case, we added Gaussian noise with different standard deviations to different local regions of the input image to achieve more realistic noise patterns. Specifically, the standard deviation of Gaussian noise for each pixel was calculated based on the local variance of its neighbouring pixels. The noisy pixel value  $I_{noisy}(i, j)$  is given by:

$$I_{noisy}(i, j) = I(i, j) + N_L(i, j), \quad (2)$$

where  $N_L(i, j)$  is a random variable generated from a Gaussian distribution with zero mean and standard deviation

$\sigma_L(i, j)$ , which is calculated as:

$$\sigma_L(i, j) = k * \sigma_{local}(i, j), \quad (3)$$

where  $\sigma_{local}(i, j)$  is the local variance of the image at pixel  $(i, j)$ , and  $k$  is a scaling factor that determines the strength of the noise.

**Poisson Noise:** Poisson noise is a type of noise that arises from the random nature of photon arrival in digital images. It is modelled as a Poisson distribution with parameter  $\lambda$ . To synthesise Poisson noise, we first modelled the image as a Poisson process and then generated noisy pixels based on this model. Specifically, the noisy pixel value  $I_{noisy}(i, j)$  is given by:

$$I_{noisy}(i, j) = \min(255, \max(0, \text{Poisson}(\lambda(i, j)) + I(i, j))), \quad (4)$$

where  $I(i, j)$  is the original pixel value at position  $(i, j)$ ,  $\lambda(i, j)$  is the mean value of the Poisson distribution, and  $\text{Poisson}(\lambda(i, j))$  is a random variable generated from a Poisson distribution with mean  $\lambda(i, j)$ .

**Speckle Noise:** Speckle noise is a type of multiplicative noise that is commonly found in ultrasound and radar images. It is modelled as a multiplicative noise with a uniform distribution between 0 and 1. To synthesise speckle noise, we multiplied each pixel of the original image with a random value drawn from a uniform distribution between 0 and 1. Specifically, the noisy pixel value  $I_{noisy}(i, j)$  is given by:

$$I_{noisy}(i, j) = I(i, j) * U(0, 1), \quad (5)$$

where  $U(0, 1)$  is a random variable drawn from a uniform distribution between 0 and 1.

**Salt-and-Pepper Noise:** Salt-and-pepper noise is a type of impulse noise that occurs when some pixels in the image are replaced with the maximum or minimum pixel value. It is modelled as a random process that replaces a certain percentage of the pixels in the image with either the maximum or minimum pixel value. Specifically, the noisy pixel value  $I_{noisy}(i, j)$  can be calculated as follows:

$$I_{noisy}(i, j) = I(i, j) + S(i, j) - P(i, j), \quad (6)$$

where  $S(i, j)$  and  $P(i, j)$  are random variables that model the presence of salt-and-pepper noise, respectively. They are defined as follows:

$$S(i, j) = I_{max} * \text{Bernoulli}(p_s), \quad (7)$$

$$P(i, j) = I_{min} * \text{Bernoulli}(p_p), \quad (8)$$

where  $\text{Bernoulli}(p)$  is a random variable that takes the value 1 with probability  $p$  and the value 0 with probability  $1 - p$ .

<sup>1</sup><https://pillow.readthedocs.io/en/stable/>

Note that  $S(i, j)$  and  $P(i, j)$  are only added to the pixel value  $I(i, j)$  with the respective set probabilities  $p_s$  and  $p_p$ . Therefore, the total percentage of pixels affected by salt and pepper noise is  $p_s + p_p$ .

## 6.2. Downscale Corruption

The down-scale corruption contains down-scale interpolation, including Bicubic, Lanczos, Bilinear and Hamming. We use OpenCV-Python for the down-scaling process.

## 7. Additional Qualitative Results

The following figures show the denoising comparison on both synthetic noise removal (Figure S5 – Figure S14) and denoising real noise data (Figure S15 – Figure S22).

## References

- [1] Abdelrahman Abdelhamed, Stephen Lin, and Michael S. Brown. A high-quality denoising dataset for smartphone cameras. In *IEEE Conference on Computer Vision and Pattern Recognition (CVPR)*, June 2018.
- [2] Eirikur Agustsson and Radu Timofte. Ntire 2017 challenge on single image super-resolution: Dataset and study. In *The IEEE Conference on Computer Vision and Pattern Recognition (CVPR) Workshops*, July 2017.
- [3] Joshua Batson and Loic Royer. Noise2self: Blind denoising by self-supervision. In *International Conference on Machine Learning*, pages 524–533. PMLR, 2019.
- [4] Marco Bevilacqua, Aline Roumy, Christine Guillemot, and Marie Line Alberi-Morel. Low-complexity single-image super-resolution based on nonnegative neighbor embedding. 2012.
- [5] Liangyu Chen, Xiaojie Chu, Xiangyu Zhang, and Jian Sun. Simple baselines for image restoration. In *European Conference on Computer Vision*, pages 17–33. Springer, 2022.
- [6] Wenchao Du, Hu Chen, and Hongyu Yang. Learning invariant representation for unsupervised image restoration. In *Proceedings of the IEEE/CVF conference on computer vision and pattern recognition*, pages 14483–14492, 2020.
- [7] Rich Franzen. Kodak lossless true color image suite. *source: <http://r0k.us/graphics/kodak>*, 4(2), 1999.
- [8] Clément Godard, Kevin Matzen, and Matt Uyttendaele. Deep burst denoising. In *Proceedings of the European conference on computer vision*, pages 538–554, 2018.
- [9] Kuldeep Kulkarni, Suhas Lohit, Pavan Turaga, Ronan Keriviche, and Amit Ashok. Reconnet: Non-iterative reconstruction of images from compressively sensed measurements. In *Proceedings of the IEEE conference on computer vision and pattern recognition*, pages 449–458, 2016.
- [10] Jaakko Lehtinen, Jacob Munkberg, Jon Hasselgren, Samuli Laine, Tero Karras, Miika Aittala, and Timo Aila. Noise2noise: Learning image restoration without clean data. *arXiv preprint arXiv:1803.04189*, 2018.
- [11] Ze Liu, Yutong Lin, Yue Cao, Han Hu, Yixuan Wei, Zheng Zhang, Stephen Lin, and Baining Guo. Swin transformer: Hierarchical vision transformer using shifted windows. In *Proceedings of the IEEE/CVF International Conference on Computer Vision*, 2021.
- [12] David Martin, Charless Fowlkes, Doron Tal, and Jitendra Malik. A database of human segmented natural images and its application to evaluating segmentation algorithms and measuring ecological statistics. In *Proceedings of IEEE International Conference on Computer Vision*, volume 2, pages 416–423. IEEE, 2001.
- [13] Seonghyeon Nam, Youngbae Hwang, Yasuyuki Matsushita, and Seon Joo Kim. A holistic approach to cross-channel image noise modeling and its application to image denoising. In *Proceedings of the IEEE conference on computer vision and pattern recognition*, pages 1683–1691, 2016.
- [14] Reyhaneh Neshatavar, Mohsen Yavartanoo, Sanghyun Son, and Kyoung Mu Lee. Cvf-sid: Cyclic multi-variate function for self-supervised image denoising by disentangling noise from image. In *Proceedings of the IEEE/CVF Conference on Computer Vision and Pattern Recognition*, pages 17583–17591, 2022.
- [15] Tongyao Pang, Huan Zheng, Yuhui Quan, and Hui Ji. Recorrupted-to-recorrupted: unsupervised deep learning for image denoising. In *Proceedings of the IEEE/CVF conference on computer vision and pattern recognition*, pages 2043–2052, 2021.
- [16] Yuhui Quan, Mingqin Chen, Tongyao Pang, and Hui Ji. Self2self with dropout: Learning self-supervised denoising from single image. In *Proceedings of the IEEE/CVF conference on computer vision and pattern recognition*, pages 1890–1898, 2020.
- [17] Dmitry Ulyanov, Andrea Vedaldi, and Victor Lempitsky. Deep image prior. In *Proceedings of the IEEE/CVF conference on computer vision and pattern recognition*, pages 9446–9454, 2018.
- [18] Longguang Wang, Yingqian Wang, Xiaoyu Dong, Qingyu Xu, Jungang Yang, Wei An, and Yulan Guo. Unsupervised degradation representation learning for blind super-resolution. In *Proceedings of the IEEE/CVF Conference on Computer Vision and Pattern Recognition*, pages 10581–10590, 2021.
- [19] Jun Xu, Yuan Huang, Ming-Ming Cheng, Li Liu, Fan Zhu, Zhou Xu, and Ling Shao. Noisy-as-clean: Learning self-supervised denoising from corrupted image. *IEEE Transactions on Image Processing*, 29:9316–9329, 2020.
- [20] Jun Xu, Hui Li, Zhetong Liang, David Zhang, and Lei Zhang. Real-world noisy image denoising: A new benchmark. *arXiv preprint arXiv:1804.02603*, 2018.
- [21] Syed Waqas Zamir, Aditya Arora, Salman Khan, Munawar Hayat, Fahad Shahbaz Khan, and Ming-Hsuan Yang. Restormer: Efficient transformer for high-resolution image restoration. In *Proceedings of the IEEE/CVF conference on computer vision and pattern recognition*, pages 5728–5739, 2022.
- [22] Dan Zhang, Fangfang Zhou, Yuwen Jiang, and Zhengming Fu. Mm-bsn: Self-supervised image denoising for real-world with multi-mask based on blind-spot network. In *Proceedings of the IEEE/CVF Conference on Computer Vision and Pattern Recognition*, pages 4188–4197, 2023.

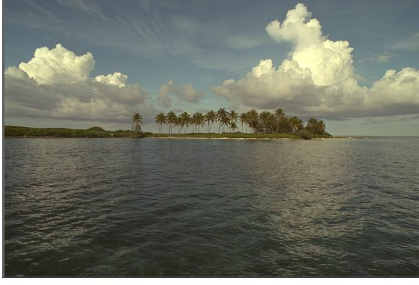

Ground Truth  
Kodak

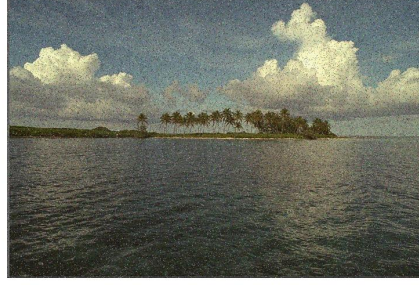

Noisy  
PSNR/ SSIM

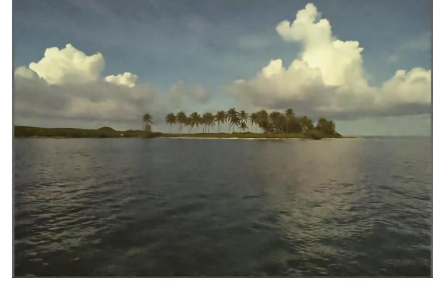

N2C  
29.92/ 0.7627

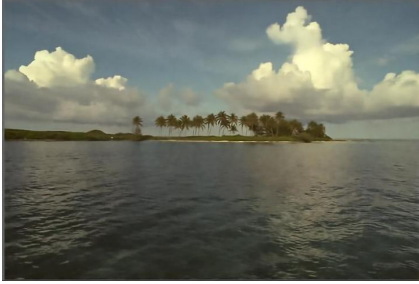

DBD  
30.59/ 0.7983

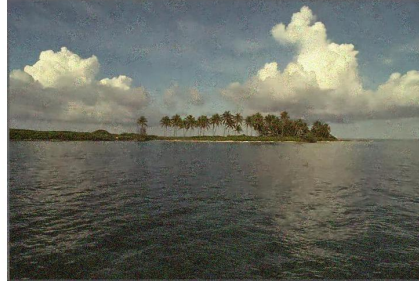

N2N  
23.61/ 0.5271

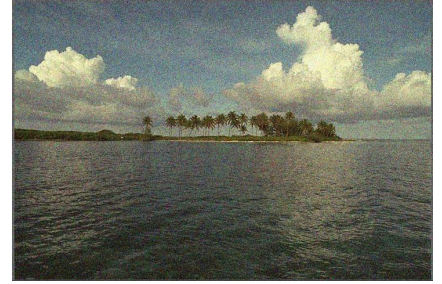

N2S  
19.20/ 0.2385

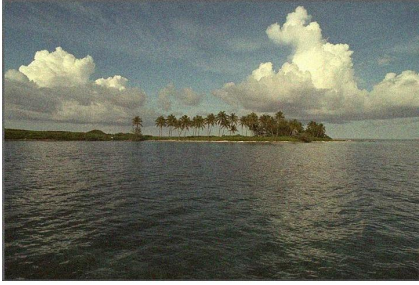

R2R  
23.62/ 0.3998

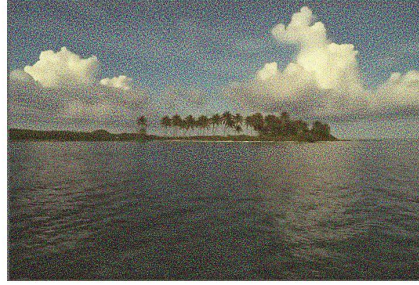

LIR  
12.55/ 0.0269

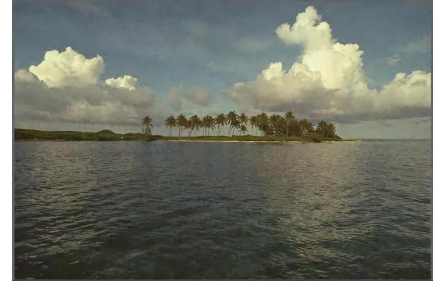

**MeD (Ours)**  
**32.05/ 0.8668**

Figure S5. Visual comparison of image denoising methods on Kodak [7] images with Gaussian ( $\sigma = 25$ ) + local variance Gaussian noise.

- [23] Kai Zhang, Wangmeng Zuo, Yunjin Chen, Deyu Meng, and Lei Zhang. Beyond a gaussian denoiser: Residual learning of deep cnn for image denoising. *IEEE transactions on image processing*, 26(7):3142–3155, 2017.
- [24] Yi Zhang, Dasong Li, Ka Lung Law, Xiaogang Wang, Hongwei Qin, and Hongsheng Li. Idr: Self-supervised image denoising via iterative data refinement. In *Proceedings of the IEEE/CVF Conference on Computer Vision and Pattern Recognition*, pages 2098–2107, 2022.
- [25] Yulun Zhang, Kunpeng Li, Kai Li, Lichen Wang, Bineng Zhong, and Yun Fu. Image super-resolution using very deep residual channel attention networks. In *Proceedings of the European conference on computer vision*, pages 286–301, 2018.

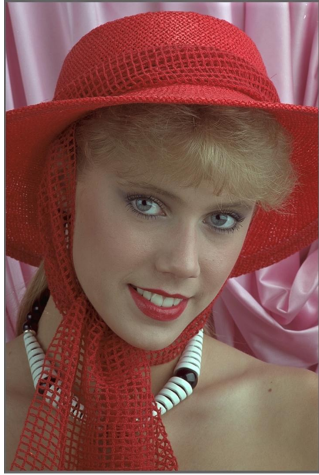

Ground Truth  
Kodak

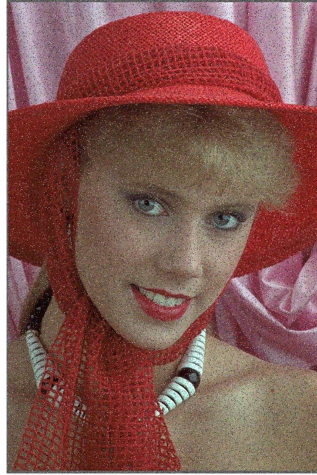

Noisy  
PSNR/ SSIM

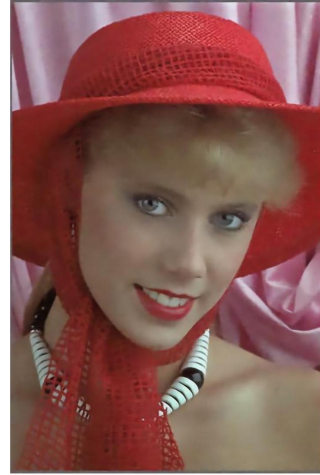

N2C  
30.75/ 0.7812

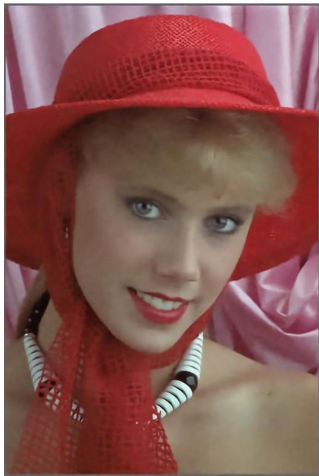

DBD  
30.47/ 0.7845

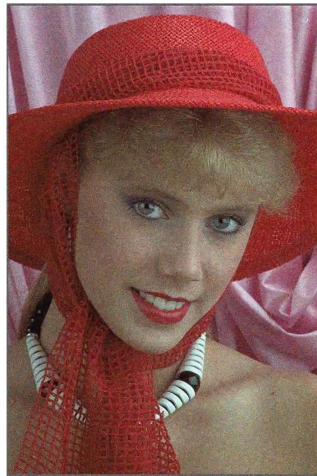

N2N  
27.28/ 0.5823

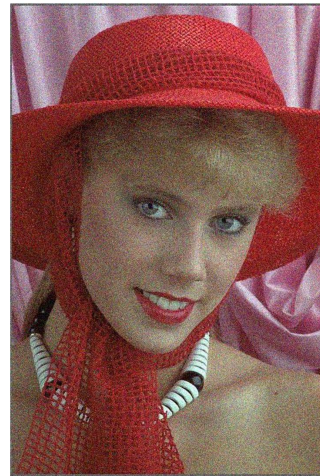

N2S  
19.32/ 0.2251

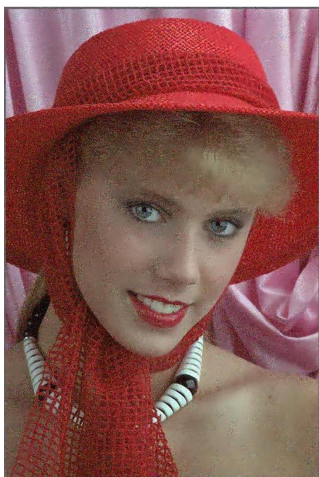

R2R  
22.66/ 0.4695

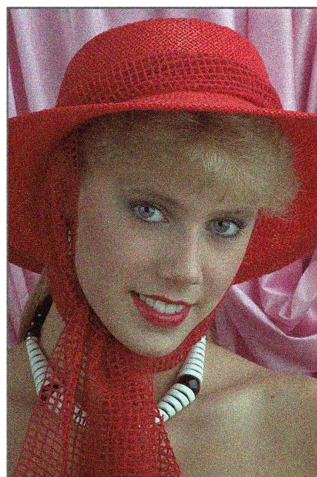

LIR  
19.32/ 0.2211

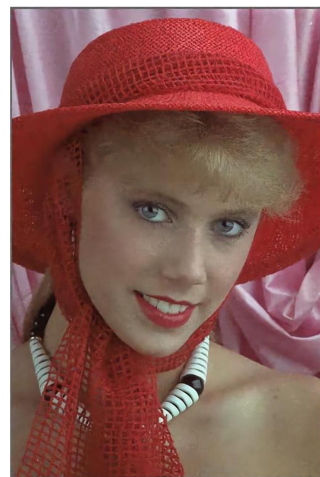

MeD (Ours)  
32.30/ 0.8421

Figure S6. Visual comparison of image denoising methods on Kodak [7] images with Gaussian ( $\sigma = 25$ ) + local variance Gaussian noise.

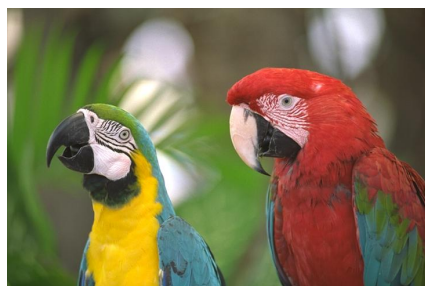

Ground Truth  
Kodak

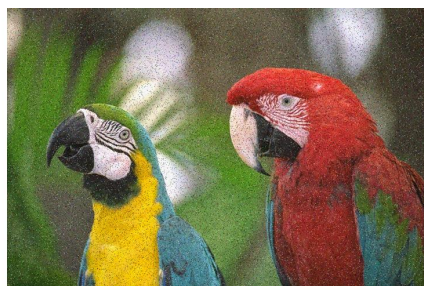

Noisy  
PSNR/ SSIM

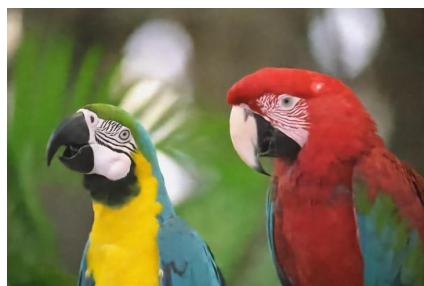

N2C  
32.84/ 0.8933

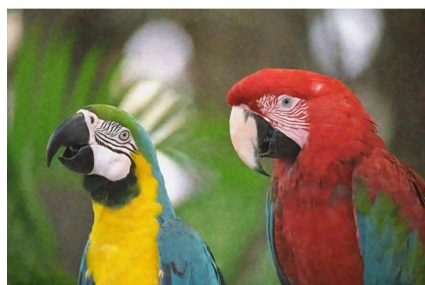

DBD  
32.58/ 0.8773

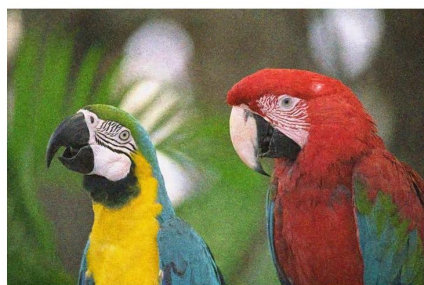

N2N  
27.70/ 0.5520

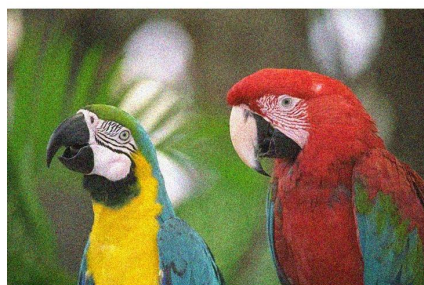

N2S  
19.42/ 0.1783

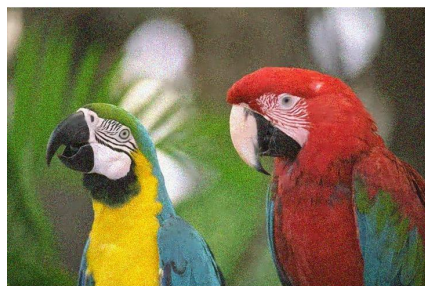

R2R  
21.01/ 0.2775

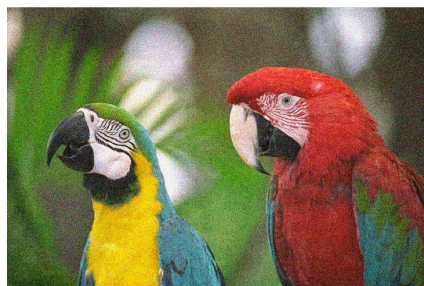

LIR  
19.45/ 0.1848

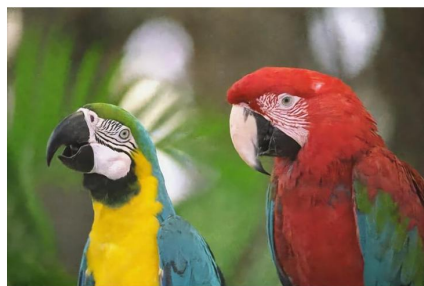

**MeD (Ours)**  
**33.96/ 0.9095**

Figure S7. Visual comparison of image denoising methods on Kodak [7] images with Gaussian ( $\sigma = 25$ ) + local variance Gaussian noise.

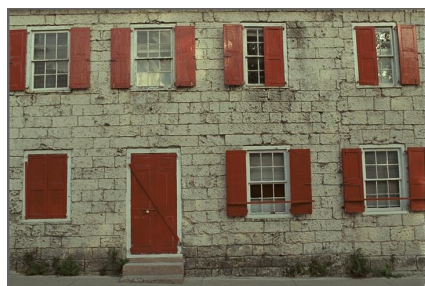

Ground Truth  
Kodak

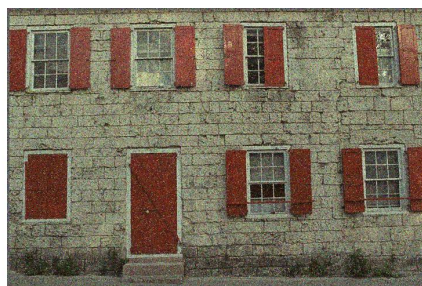

Noisy  
PSNR/ SSIM

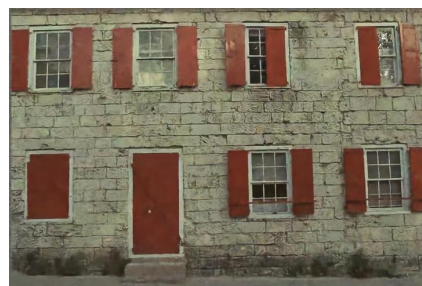

N2C  
25.98/ 0.7291

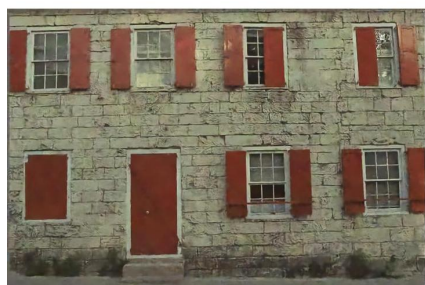

DBD  
25.82/ 0.7296

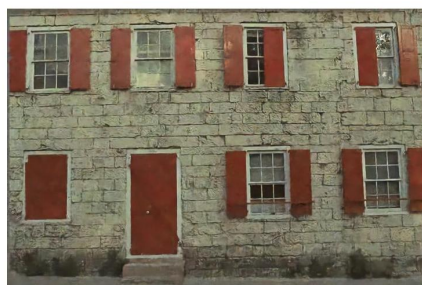

N2N  
25.86/ 0.7275

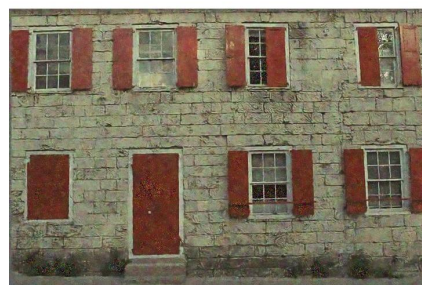

N2S  
23.46/ 0.5922

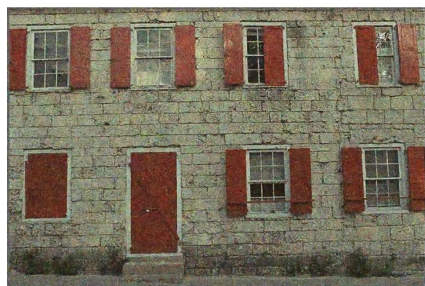

R2R  
23.18/ 0.6178

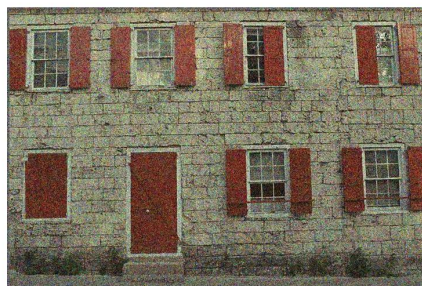

LIR  
18.96/ 0.4220

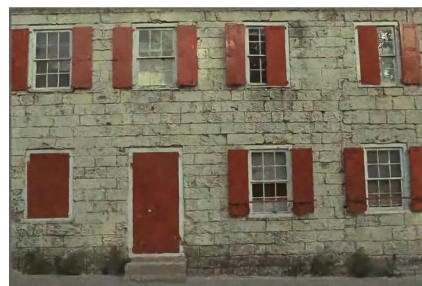

**MeD (Ours)**  
**26.12/ 0.7214**

Figure S8. Visual comparison of image denoising methods on Kodak [7] images with Gaussian ( $\sigma = 50$ ) + local variance Gaussian noise.

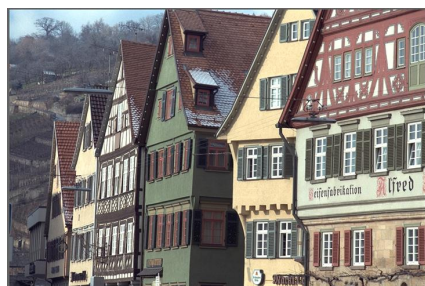

Ground Truth  
Kodak

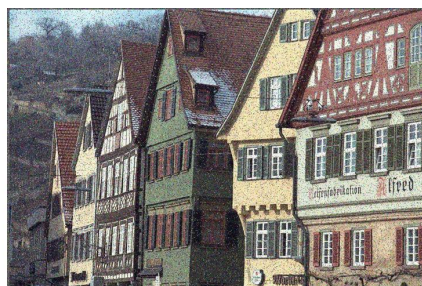

Noisy  
PSNR/ SSIM

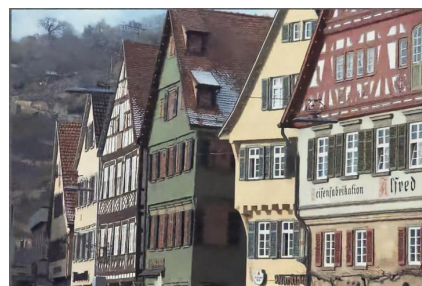

N2C  
25.01/ 0.7841

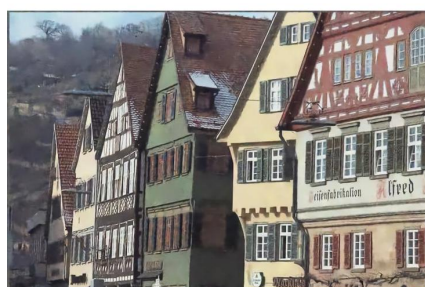

DBD  
24.83/ 0.7786

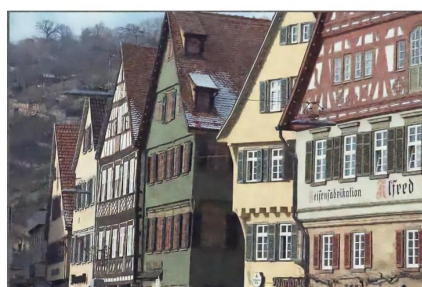

N2N  
24.93/ 0.7828

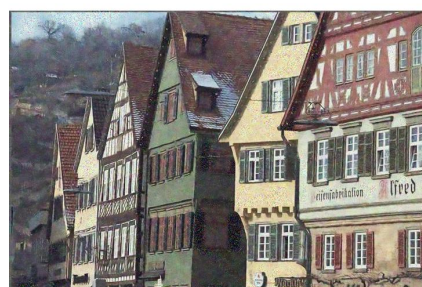

N2S  
22.14/ 0.6332

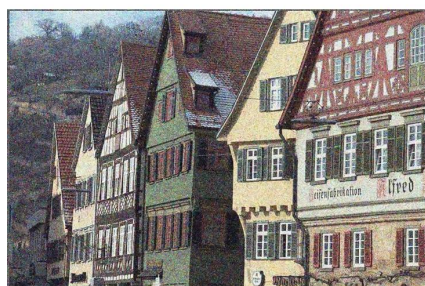

R2R  
20.37/ 0.5646

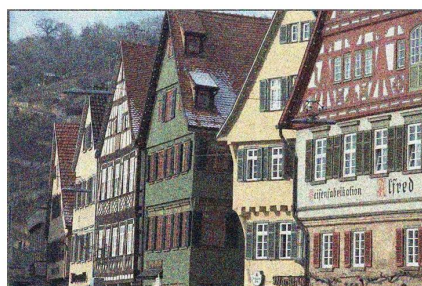

LIR  
19.31/ 0.5184

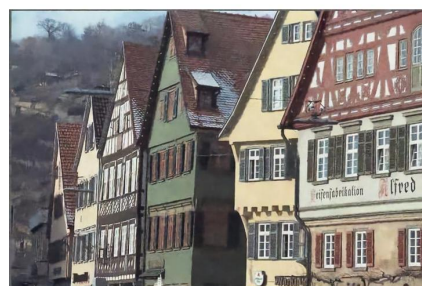

**MeD (Ours)**  
**25.66/ 0.7883**

Figure S9. Visual comparison of image denoising methods on Kodak [7] images with Gaussian ( $\sigma = 50$ ) + local variance Gaussian noise.

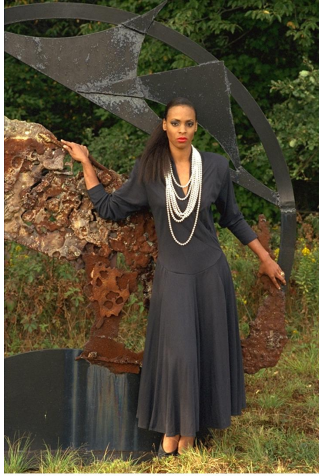

Ground Truth  
Kodak

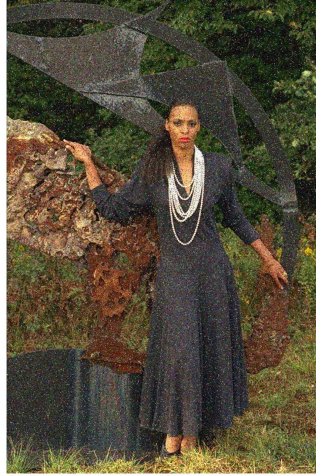

Noisy  
PSNR/ SSIM

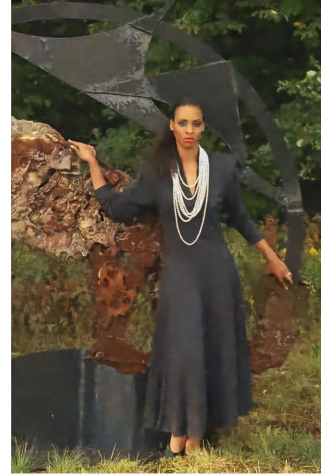

N2C  
25.79/ 0.6962

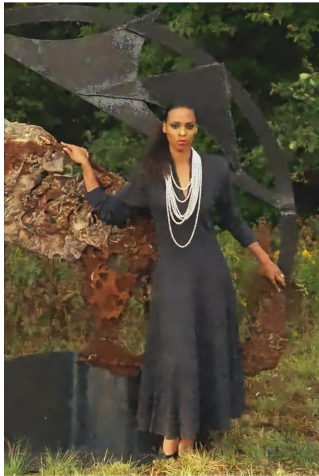

DBD  
25.64/ 0.6925

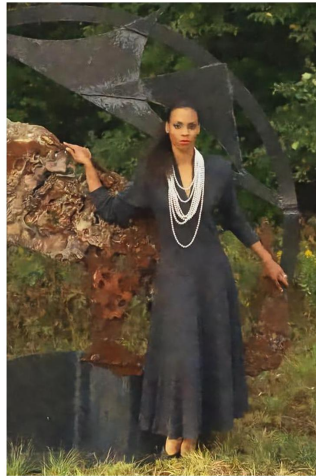

N2N  
25.82/ 0.6953

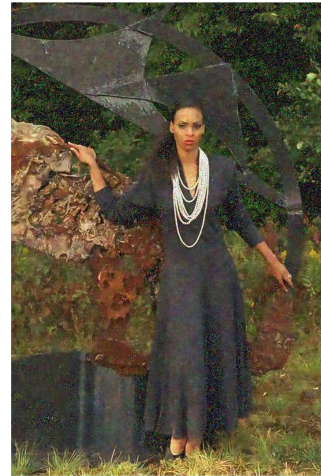

N2S  
20.97/ 0.4223

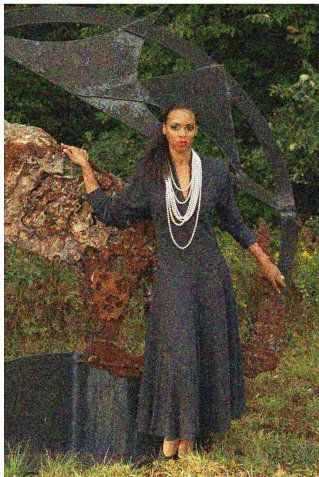

R2R  
20.91/ 0.4048

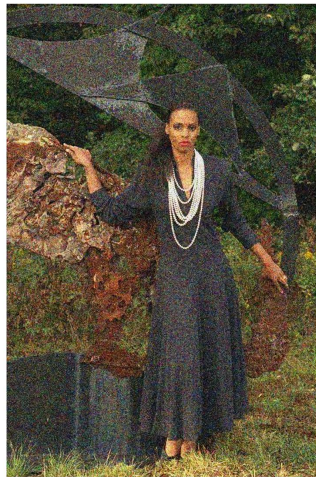

LIR  
19.74/ 0.3432

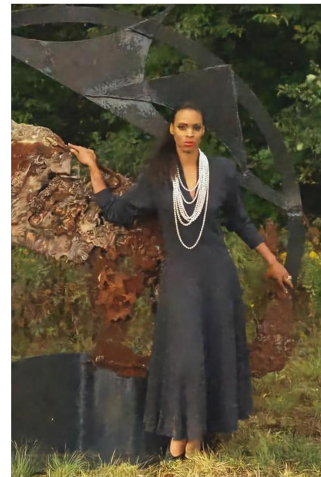

**MeD (Ours)**  
**25.86/ 0.7027**

Figure S10. Visual comparison of image denoising methods on Kodak [7] images with Gaussian ( $\sigma = 50$ ) + local variance Gaussian noise.

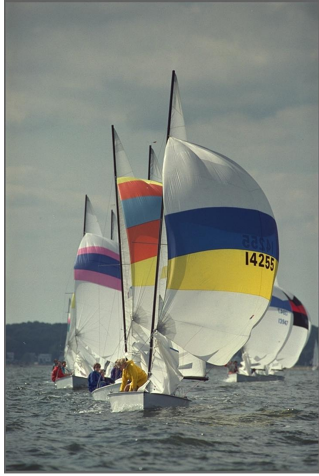

Ground Truth  
Kodak

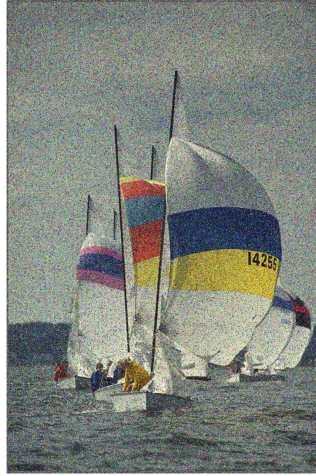

Noisy  
PSNR/ SSIM

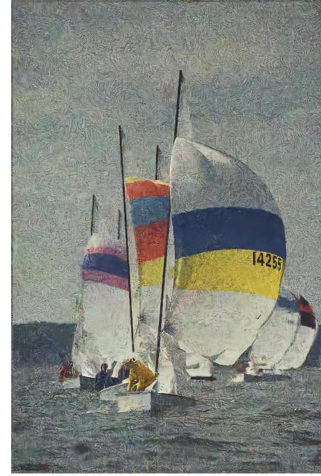

N2C  
24.39/ 0.4696

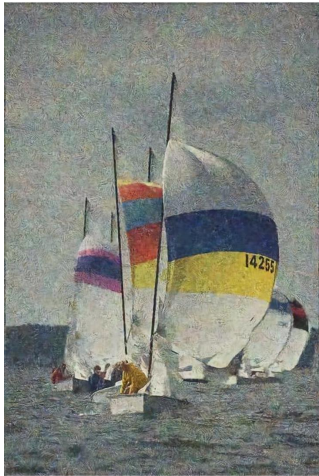

DBD  
24.37/ 0.4663

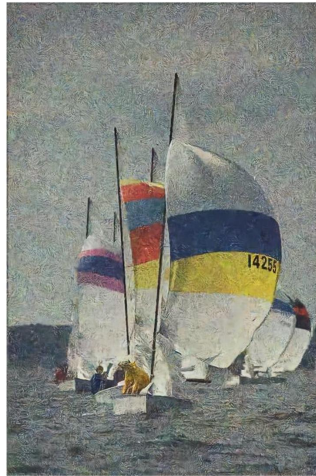

N2N  
23.94/ 0.4438

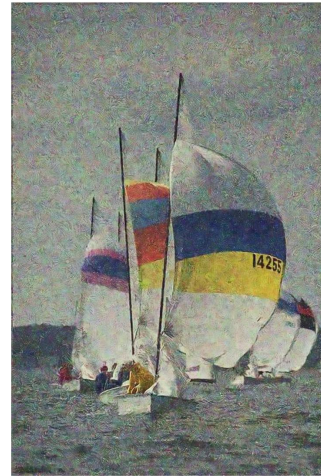

N2S  
22.07/ 0.3156

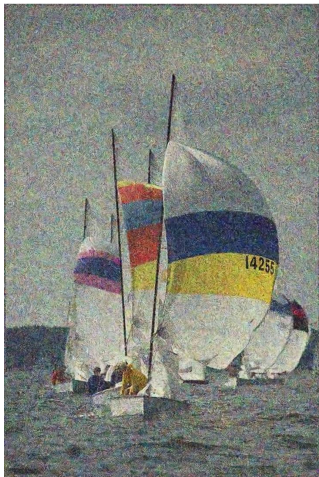

R2R  
21.23/ 0.2855

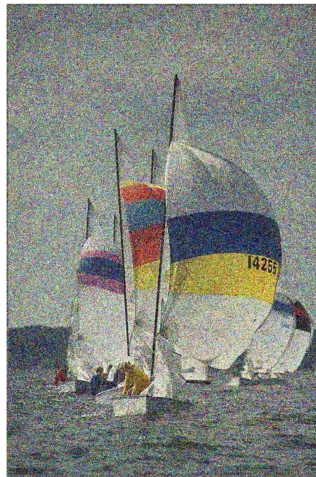

LIR  
16.94/ 0.1560

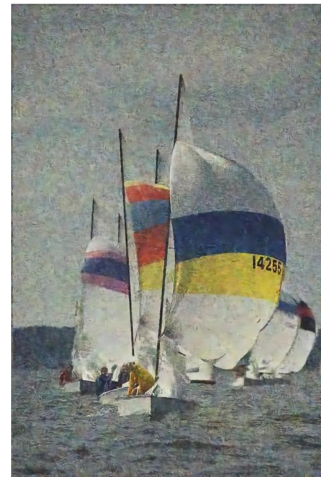

**MeD (Ours)**  
**25.96/ 0.6180**

Figure S11. Visual comparison of image denoising methods on Kodak [7] images with Gaussian ( $\sigma = 75$ ) + local variance Gaussian noise.

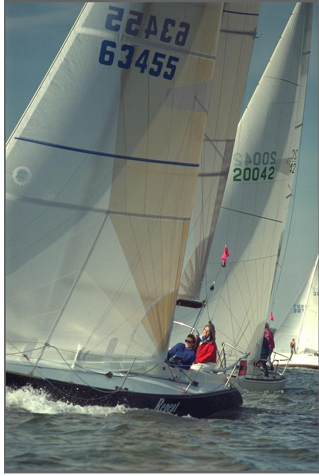

Ground Truth  
Kodak

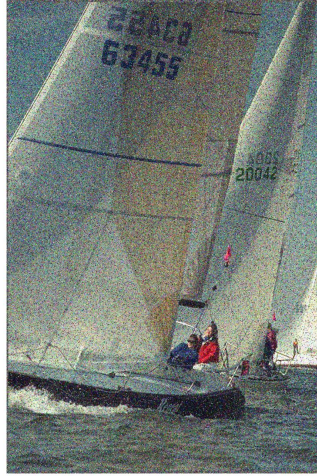

Noisy  
PSNR/ SSIM

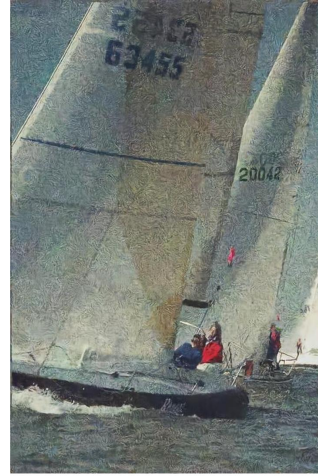

N2C  
24.27/ 0.4641

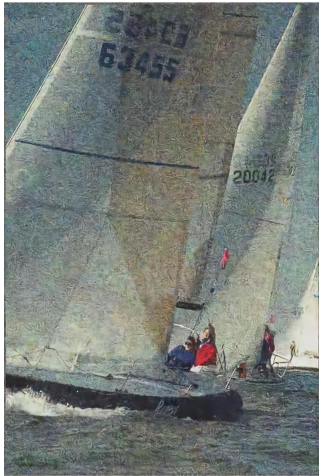

DBD  
24.00/ 0.4476

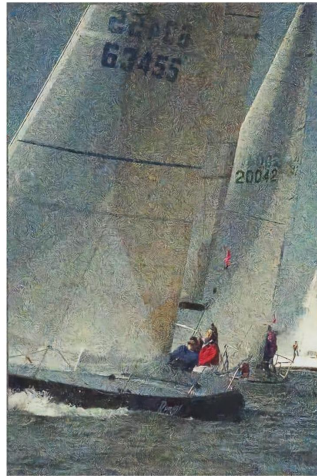

N2N  
23.79/ 0.4356

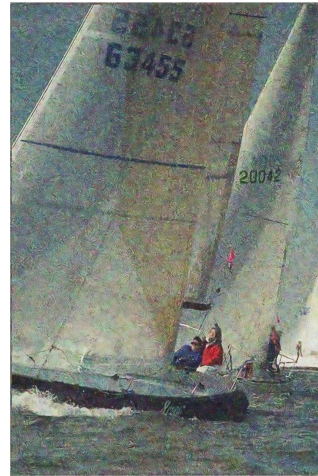

N2S  
21.88/ 0.3070

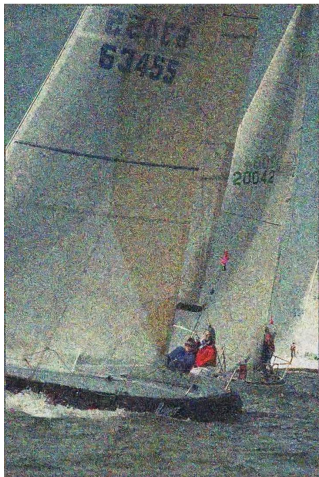

R2R  
19.79/ 0.2342

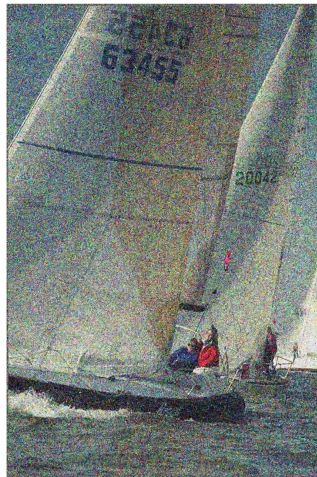

LIR  
16.99/ 0.1592

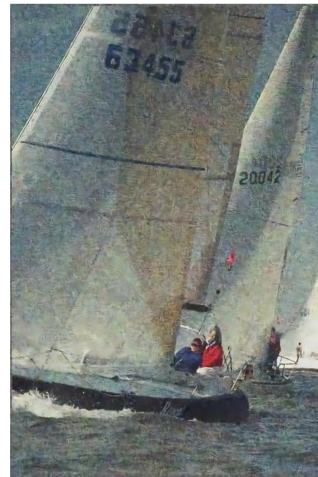

**MeD (Ours)**  
**25.62/ 0.5857**

Figure S12. Visual comparison of image denoising methods on Kodak [7] images with Gaussian ( $\sigma = 75$ ) + local variance Gaussian noise.

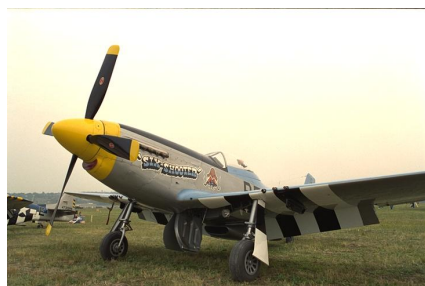

Ground Truth  
Kodak

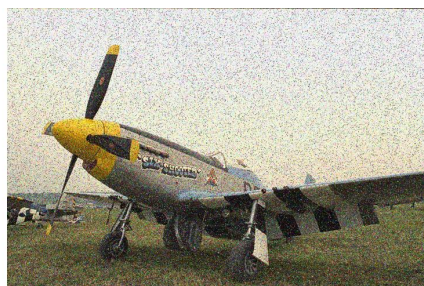

Noisy  
PSNR/ SSIM

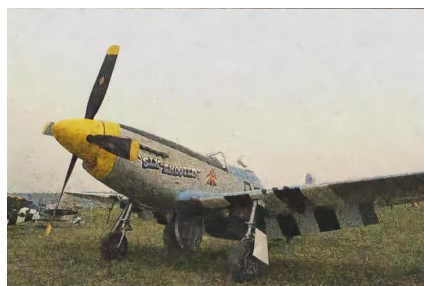

N2C  
20.18/ 0.7630

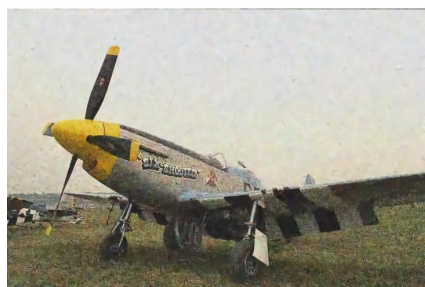

DBD  
20.20/ 0.7527

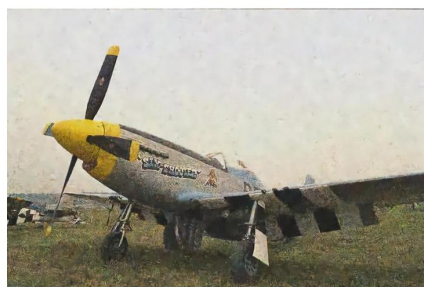

N2N  
20.31/ 0.7598

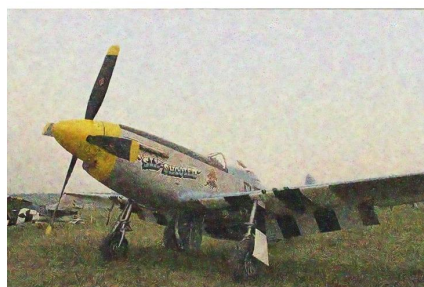

N2S  
18.97/ 0.4184

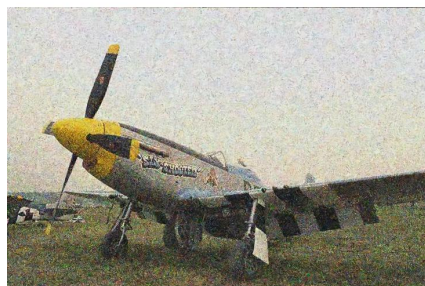

R2R  
18.19/ 0.3878

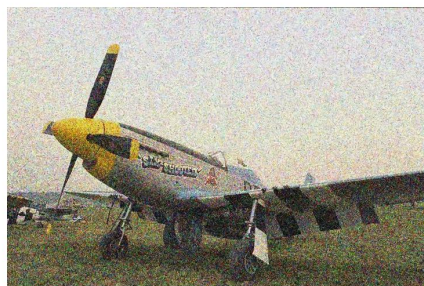

LIR  
16.93/ 0.2194

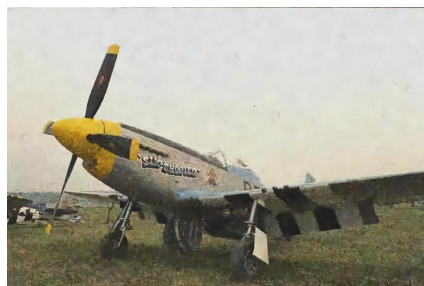

**MeD (Ours)**  
**20.70/ 0.7811**

Figure S13. Visual comparison of image denoising methods on Kodak [7] images with Gaussian ( $\sigma = 75$ ) + local variance Gaussian noise.

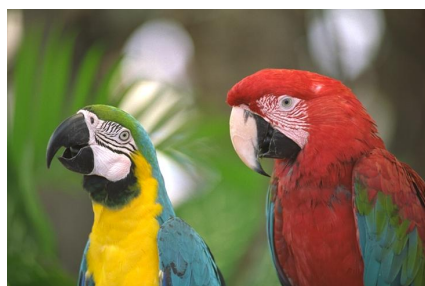

Ground Truth  
Kodak

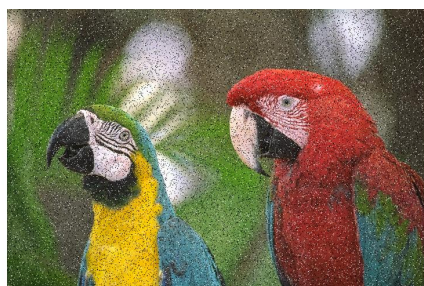

Noisy  
PSNR/ SSIM

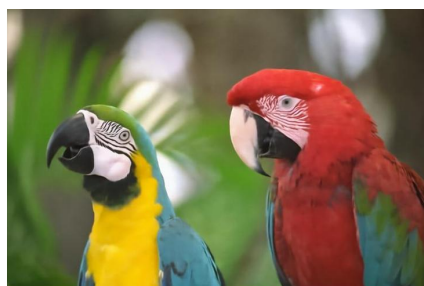

N2C  
33.99/ 0.9144

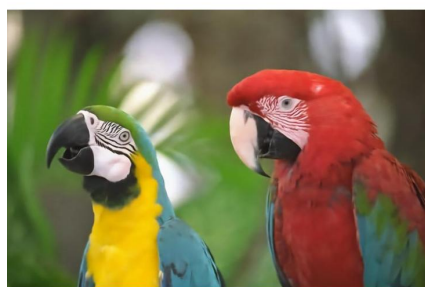

DBD  
34.47/ 0.9199

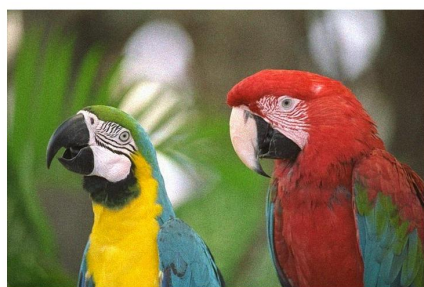

N2N  
27.24/ 0.5334

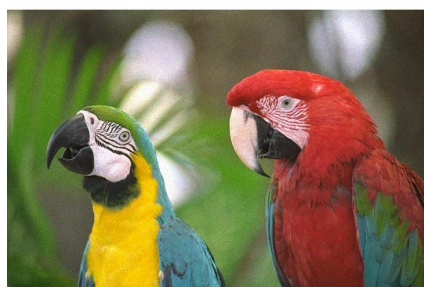

N2S  
27.77/ 0.5545

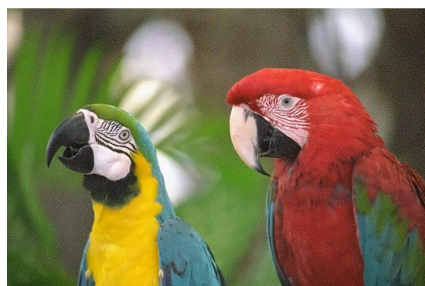

R2R  
22.79/ 0.3052

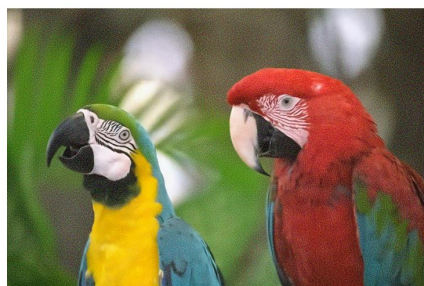

LIR  
21.78/ 0.2430

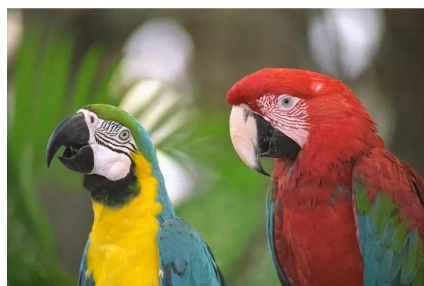

**MeD (Ours)**  
**38.36/ 0.9510**

Figure S14. Visual comparison of image denoising methods on Kodak [7] images with local variance Gaussian + Poisson noise.

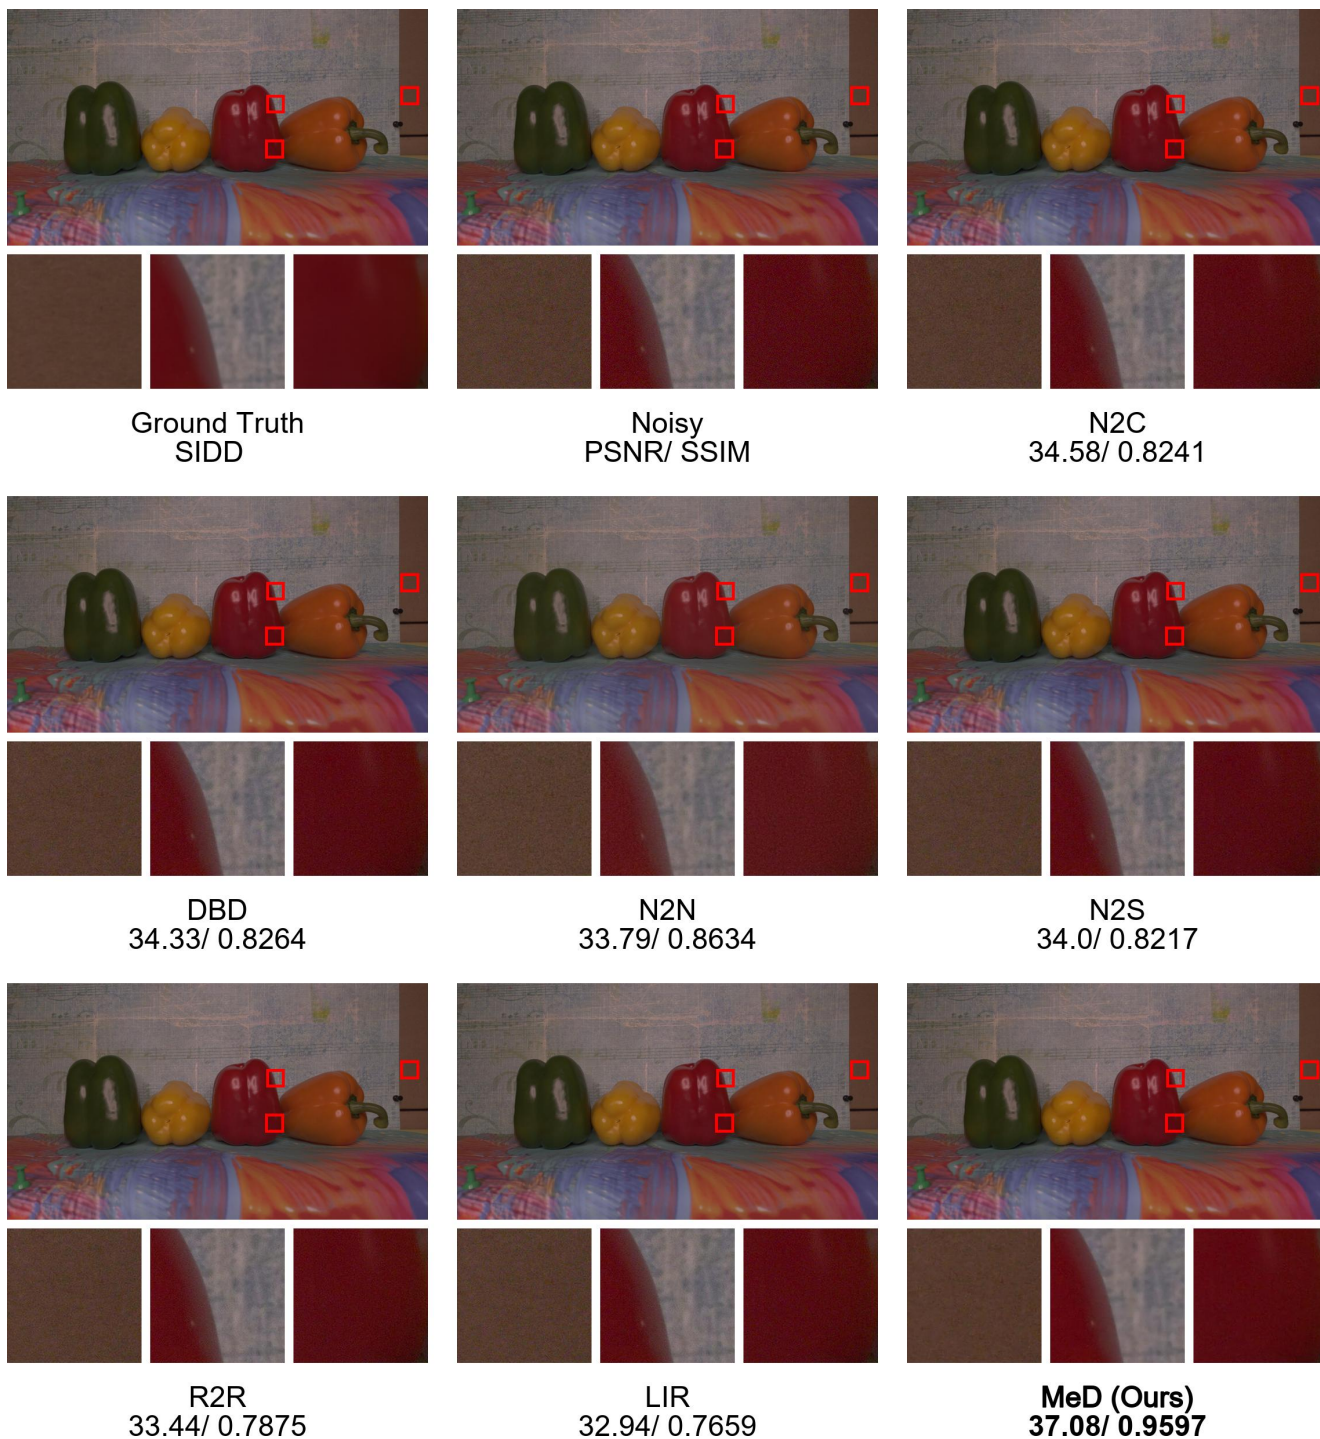

Figure S15. Visual comparison of image denoising methods on real noisy image dataset SIDD [1] example images with real noise.

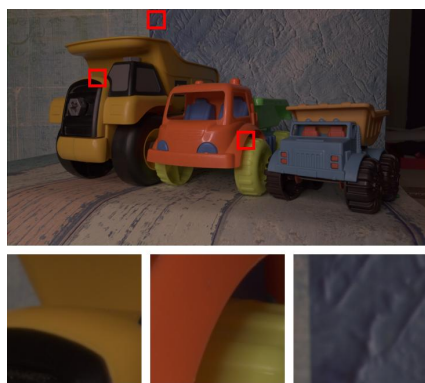

Ground Truth  
SIDD

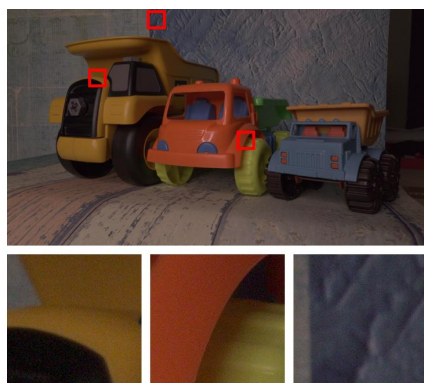

Noisy  
PSNR/ SSIM

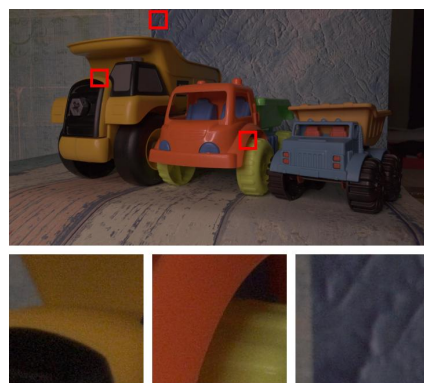

N2C  
35.61/ 0.8692

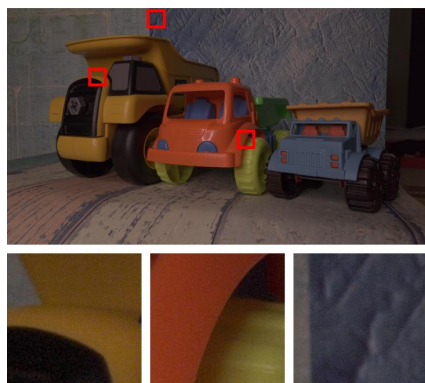

DBD  
34.07/ 0.873

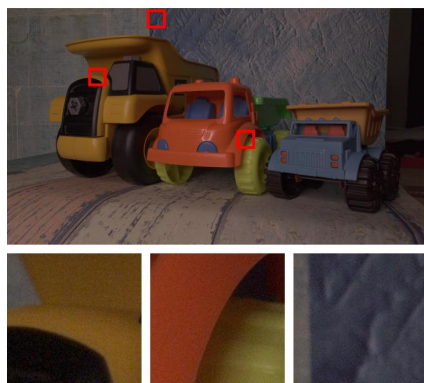

N2N  
34.15/ 0.889

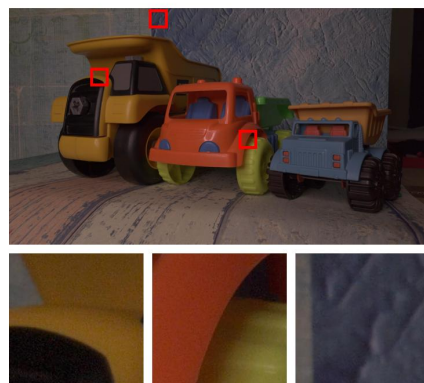

N2S  
36.13/ 0.924

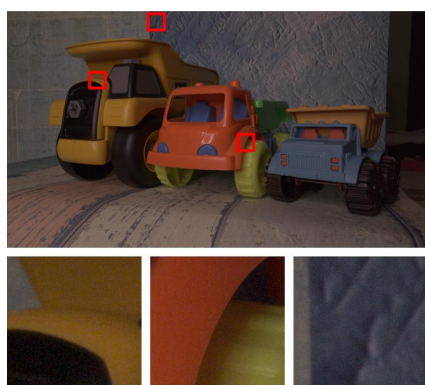

R2R  
33.25/ 0.7748

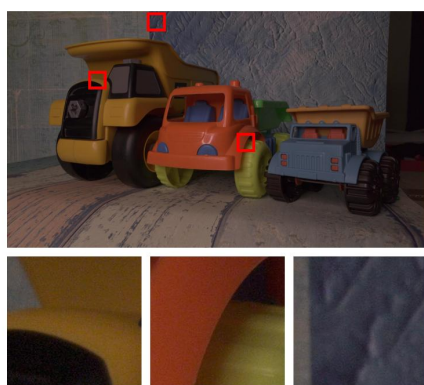

LIR  
33.95/ 0.8112

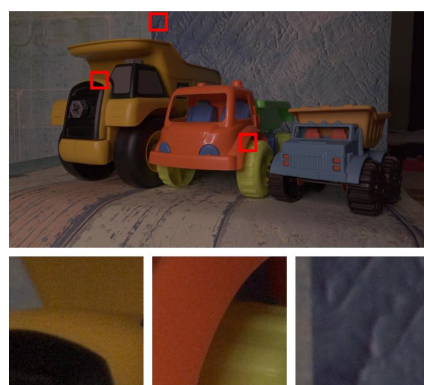

**MeD (Ours)**  
**37.13/ 0.9182**

Figure S16. Visual comparison of image denoising methods on real noisy image dataset SIDD [1] example images with real noise.

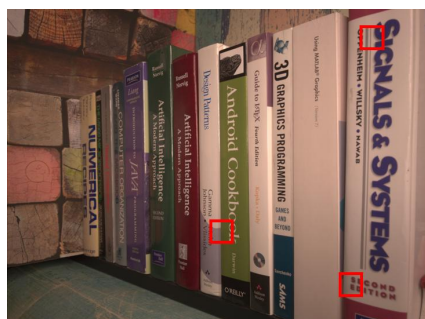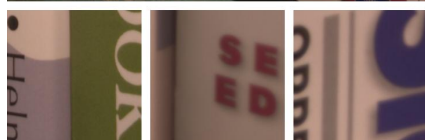

Ground Truth  
SIDD

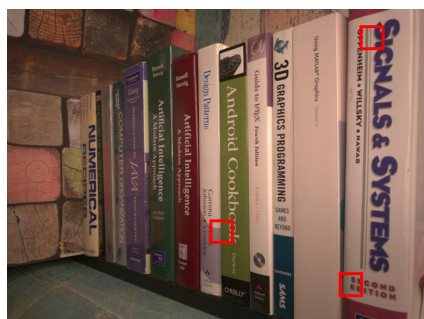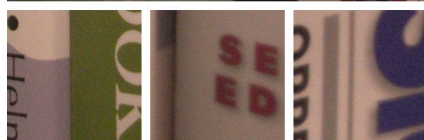

Noisy  
PSNR/ SSIM

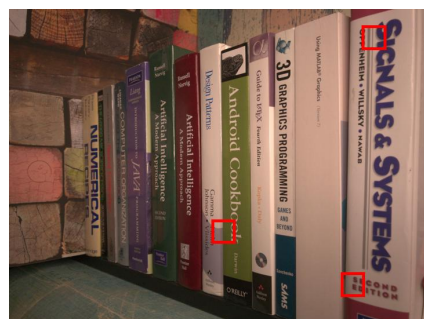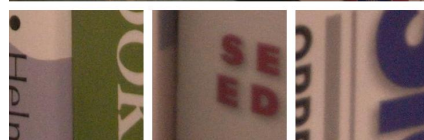

N2C  
34.52/ 0.8434

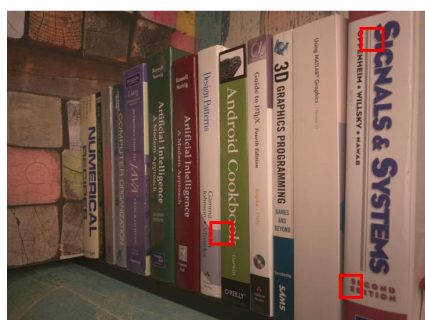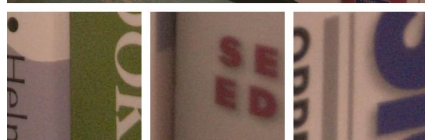

DBD  
33.63/ 0.8947

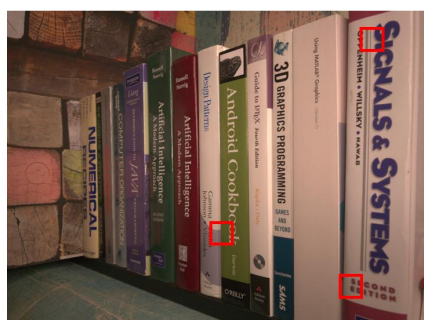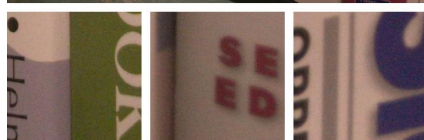

N2N  
34.42/ 0.8596

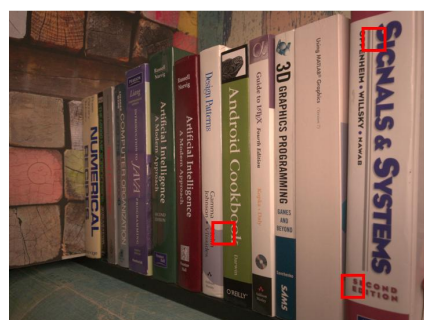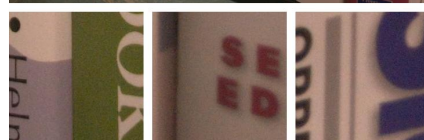

N2S  
34.77/ 0.8471

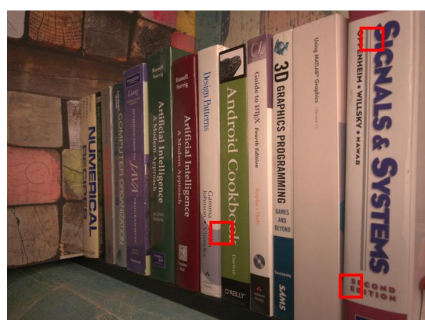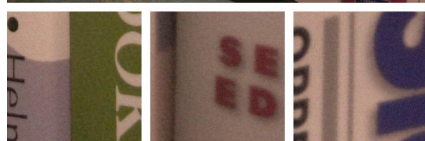

R2R  
30.06/ 0.5993

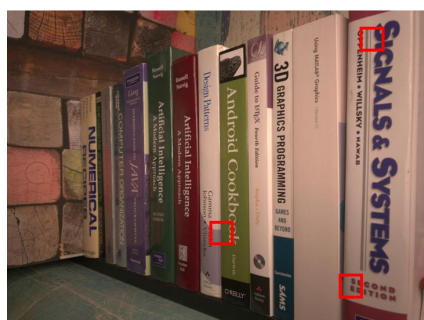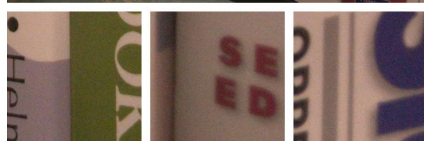

LIR  
32.93/ 0.7763

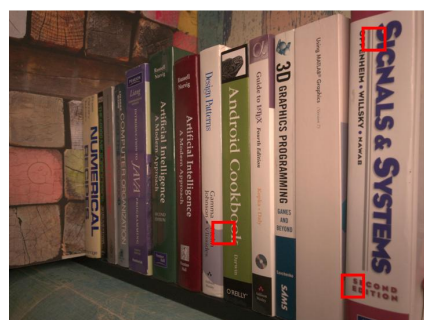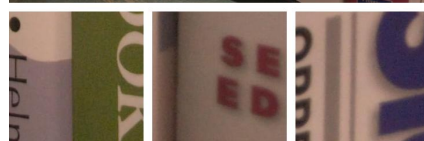

MeD (Ours)  
37.33/ 0.9352

Figure S17. Visual comparison of image denoising methods on real noisy image dataset SIDD [1] example images with real noise.

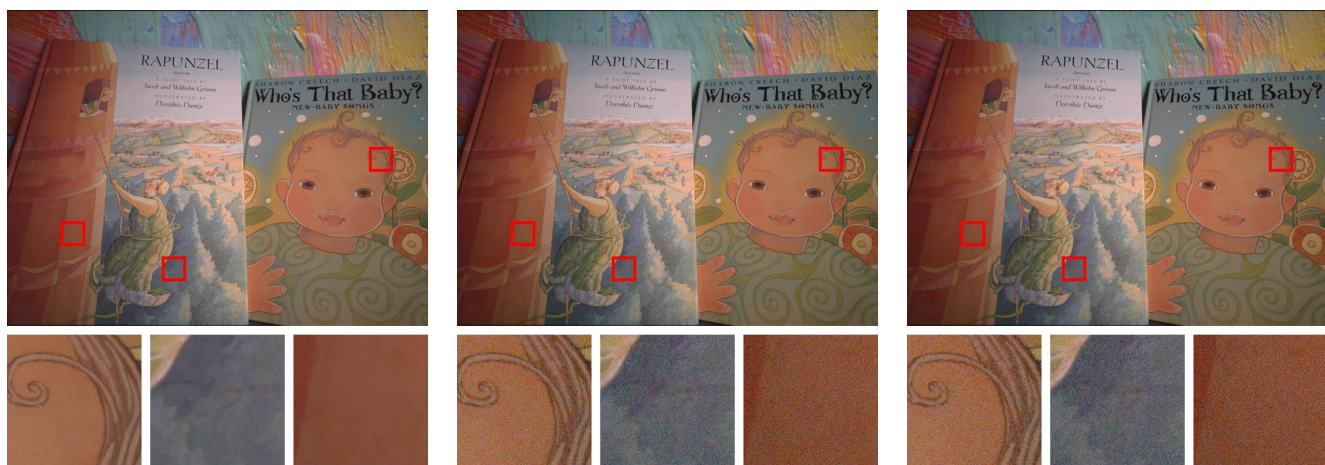

Ground Truth  
SIDD

Noisy  
PSNR/ SSIM

N2C  
27.3/ 0.4887

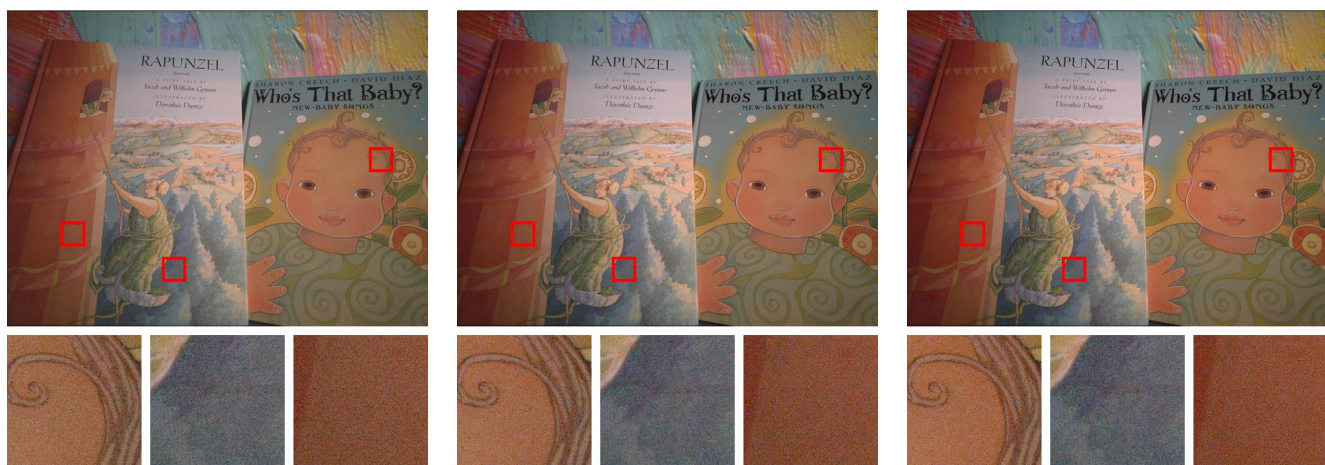

DBD  
27.38/ 0.511

N2N  
26.67/ 0.4761

N2S  
27.2/ 0.5290

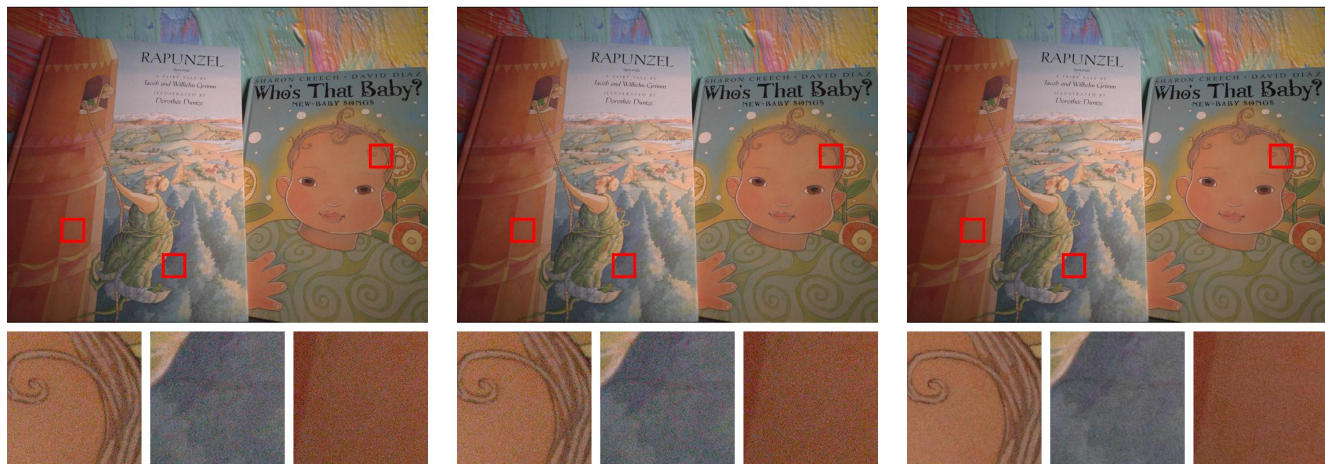

R2R  
26.33/ 0.4697

LIR  
26.38/ 0.4773

MeD (Ours)  
32.09/ 0.7453

Figure S18. Visual comparison of image denoising methods on real noisy image dataset SIDD [1] example images with real noise.

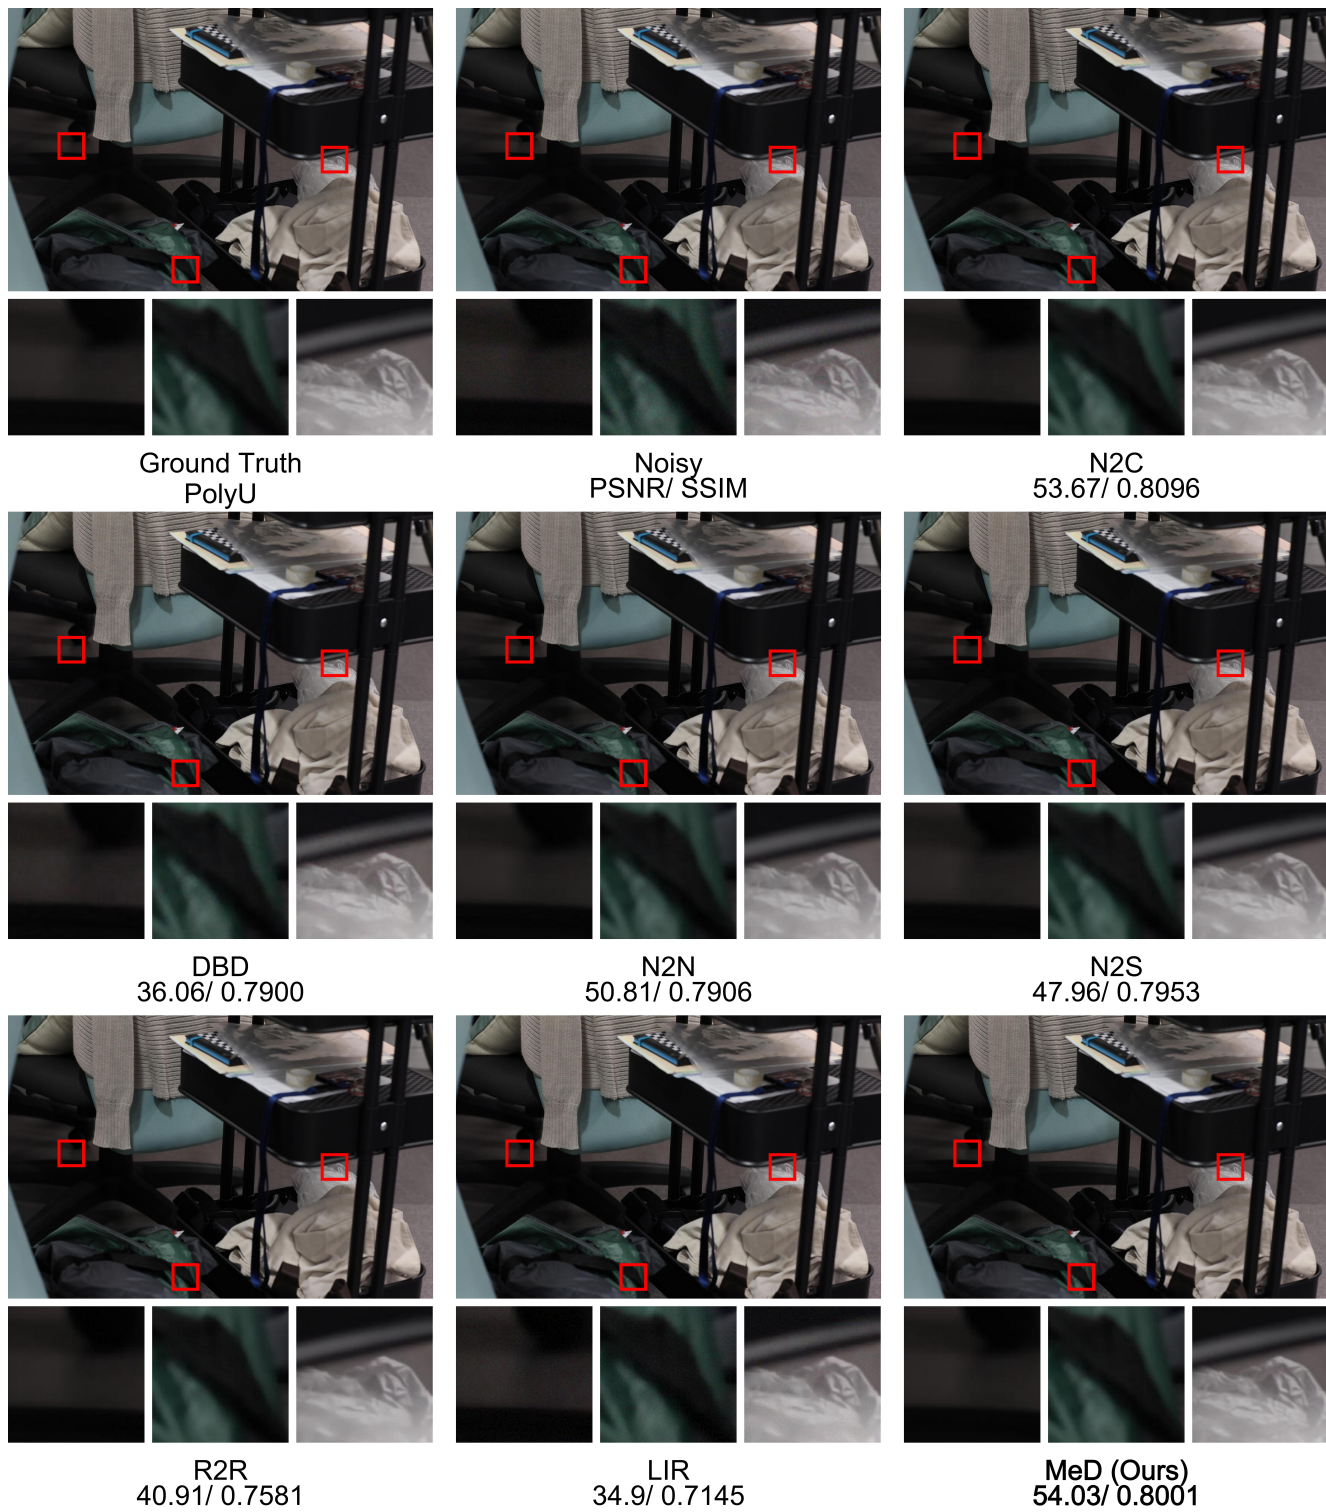

Figure S19. Visual comparison of image denoising methods on real noisy image dataset PolyU [20] example images with real noise.

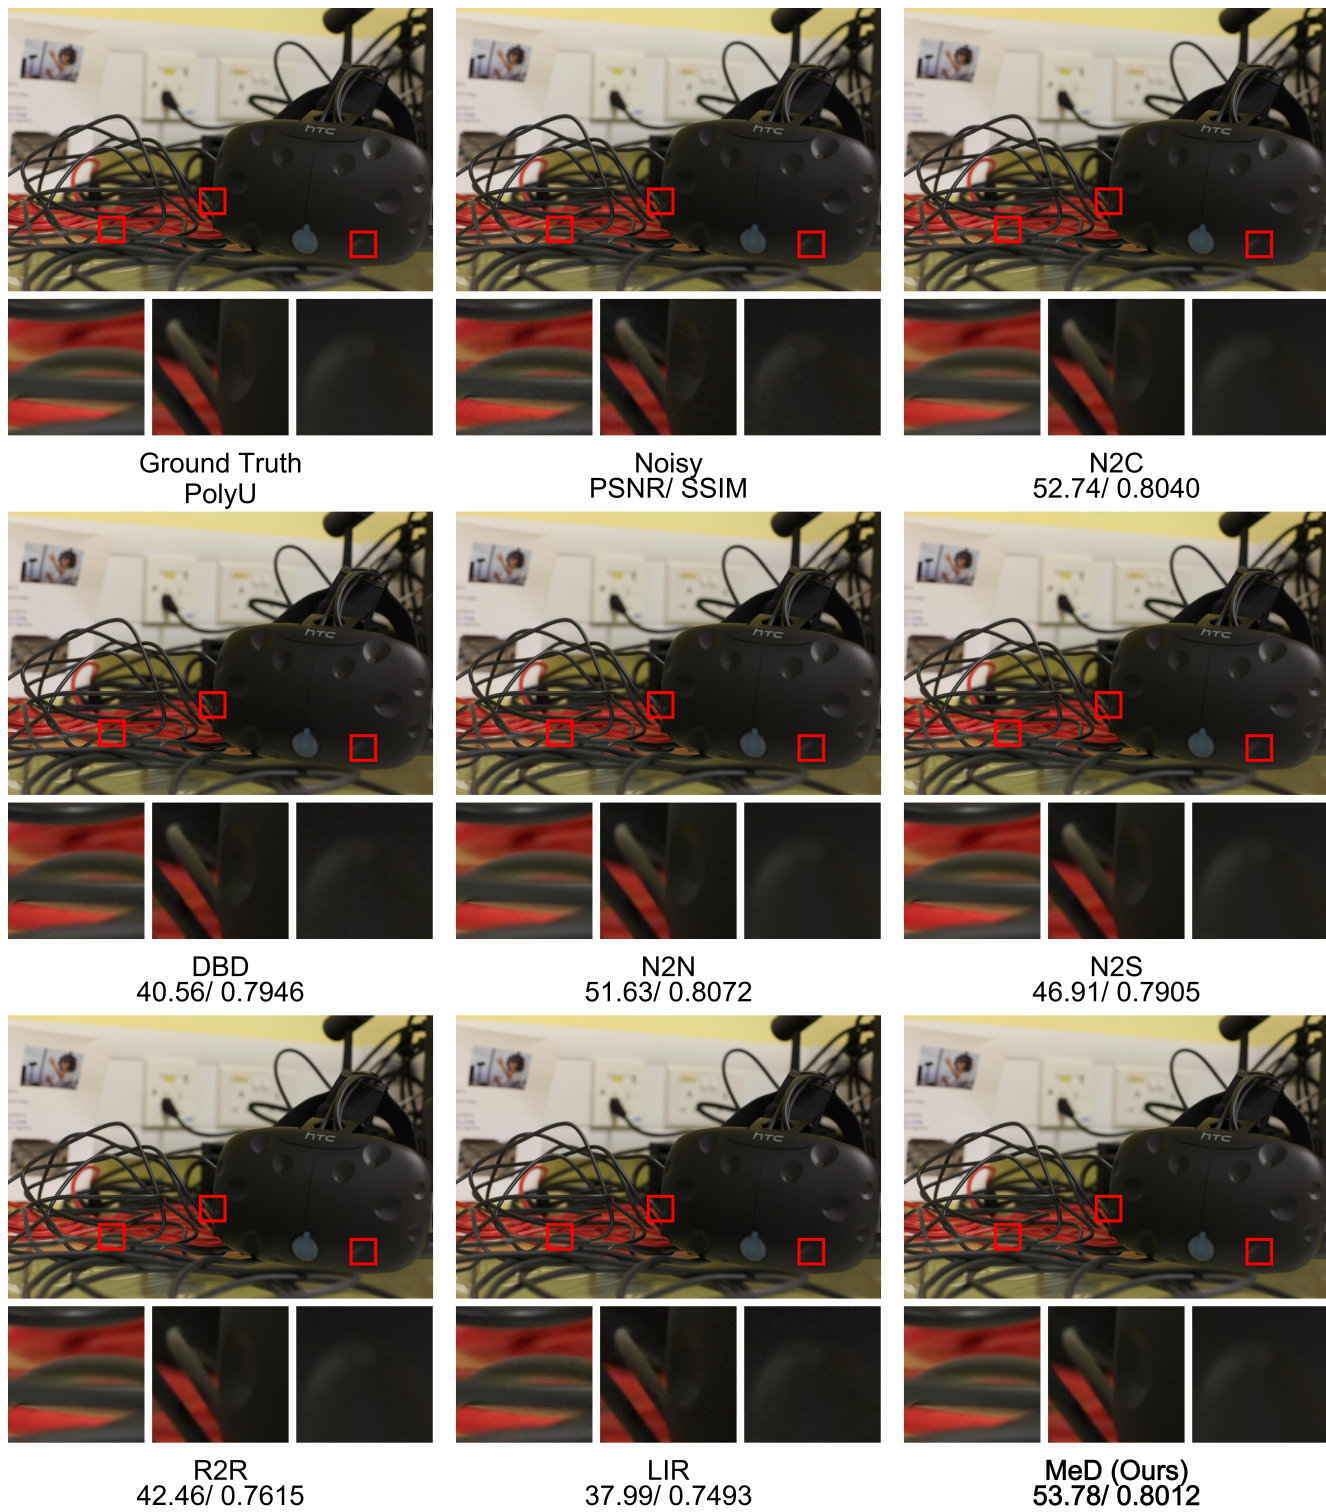

Figure S20. Visual comparison of image denoising methods on real noisy image dataset PolyU [20] example images with real noise.

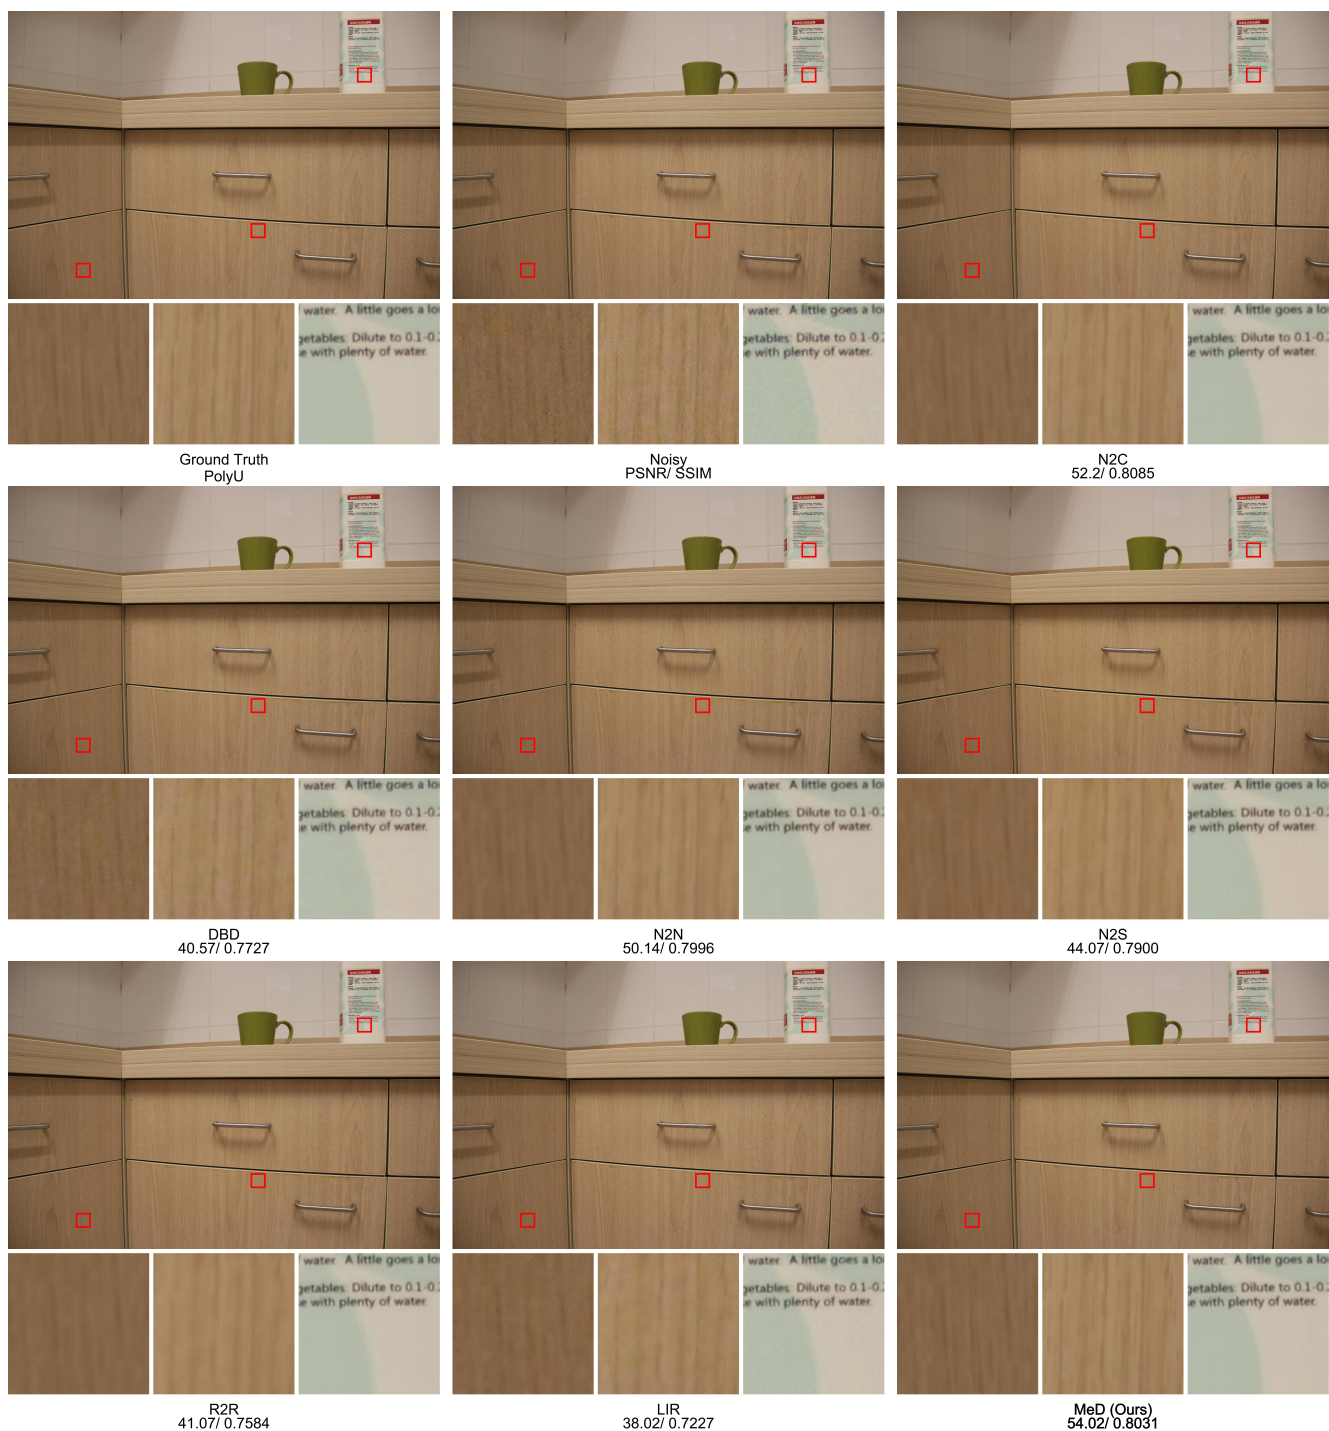

Figure S21. Visual comparison of image denoising methods on real noisy image dataset PolyU [20] example images with real noise.

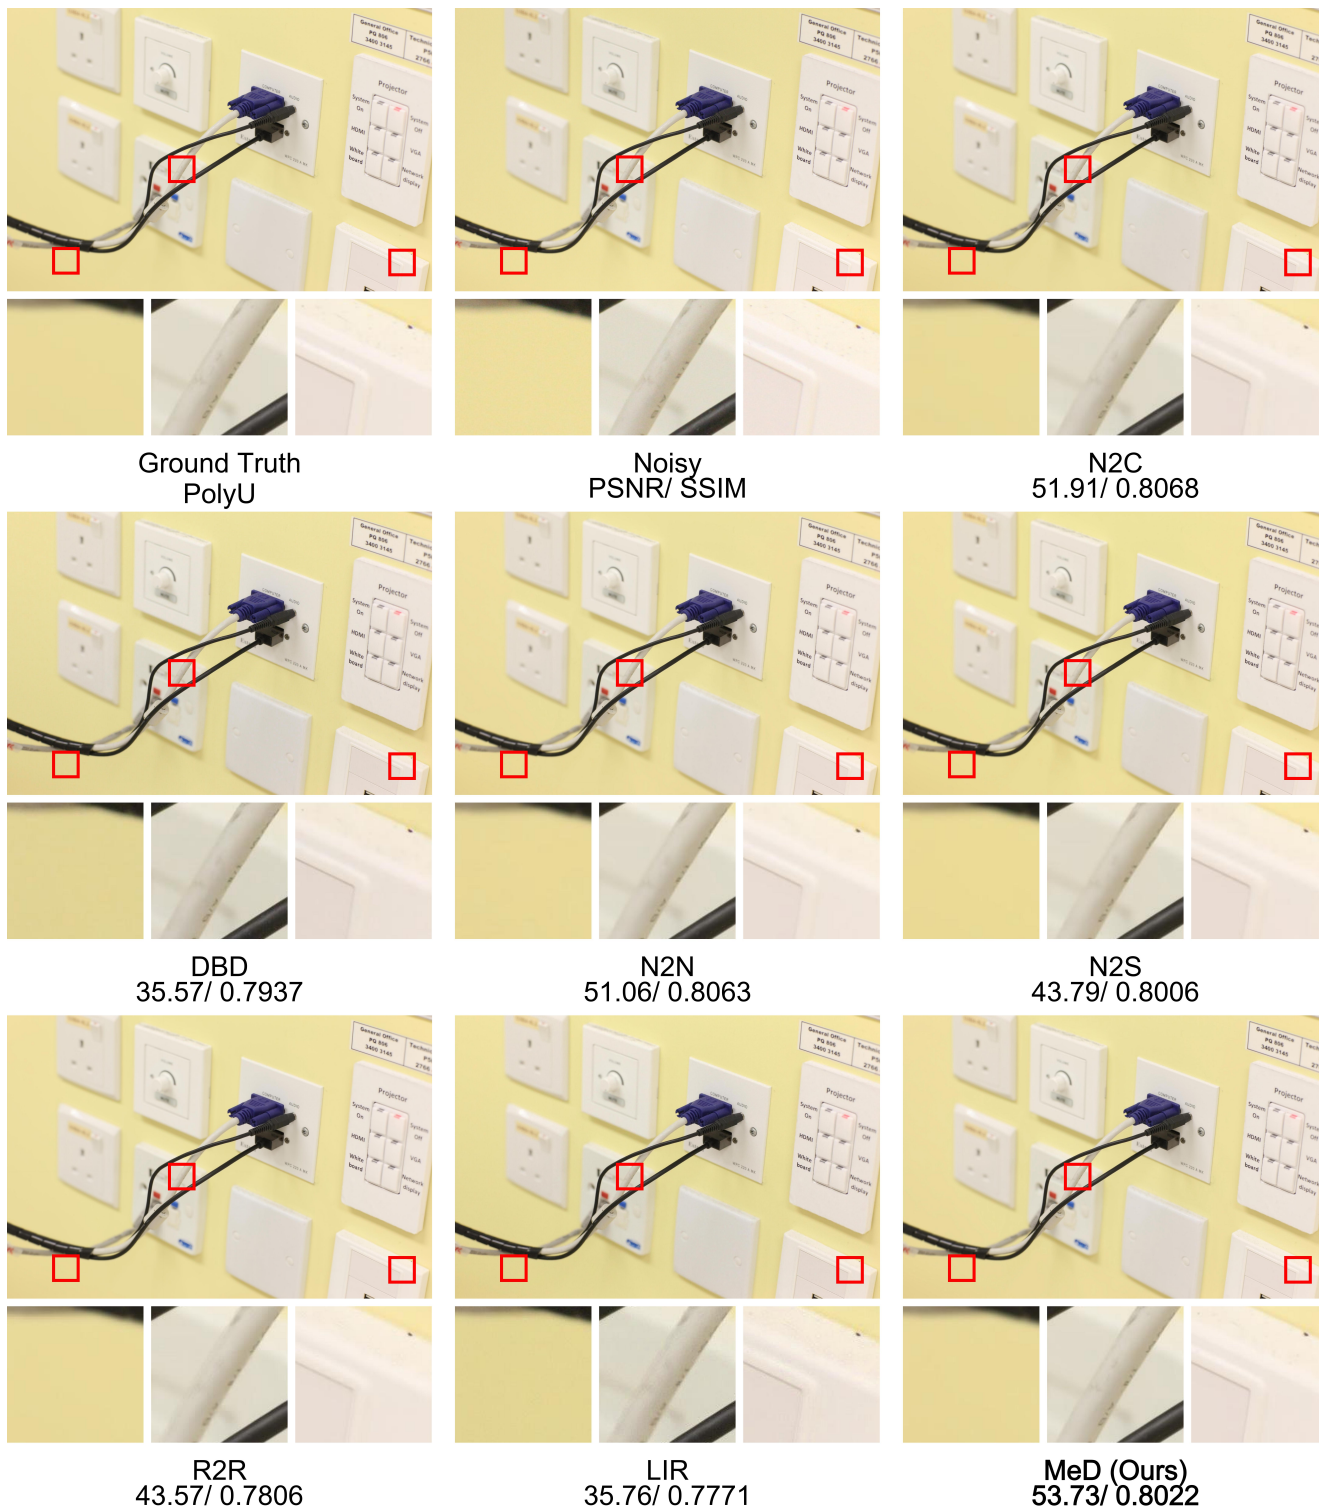

Figure S22. Visual comparison of image denoising methods on real noisy image dataset PolyU [20] example images with real noise.
